# Supplementary material for: Ar, CCl4 and C6H6 adsorption outside and inside of the bundles of multi-walled carbon nanotubes—simulation study
Source: Royal Society of Chemistry journal article supplement (doi:10.1039/b821633a), 2009-01-01
Supplement: b821633a.pdf [file b821633a.pdf]

SUPPORTING INFORMATION

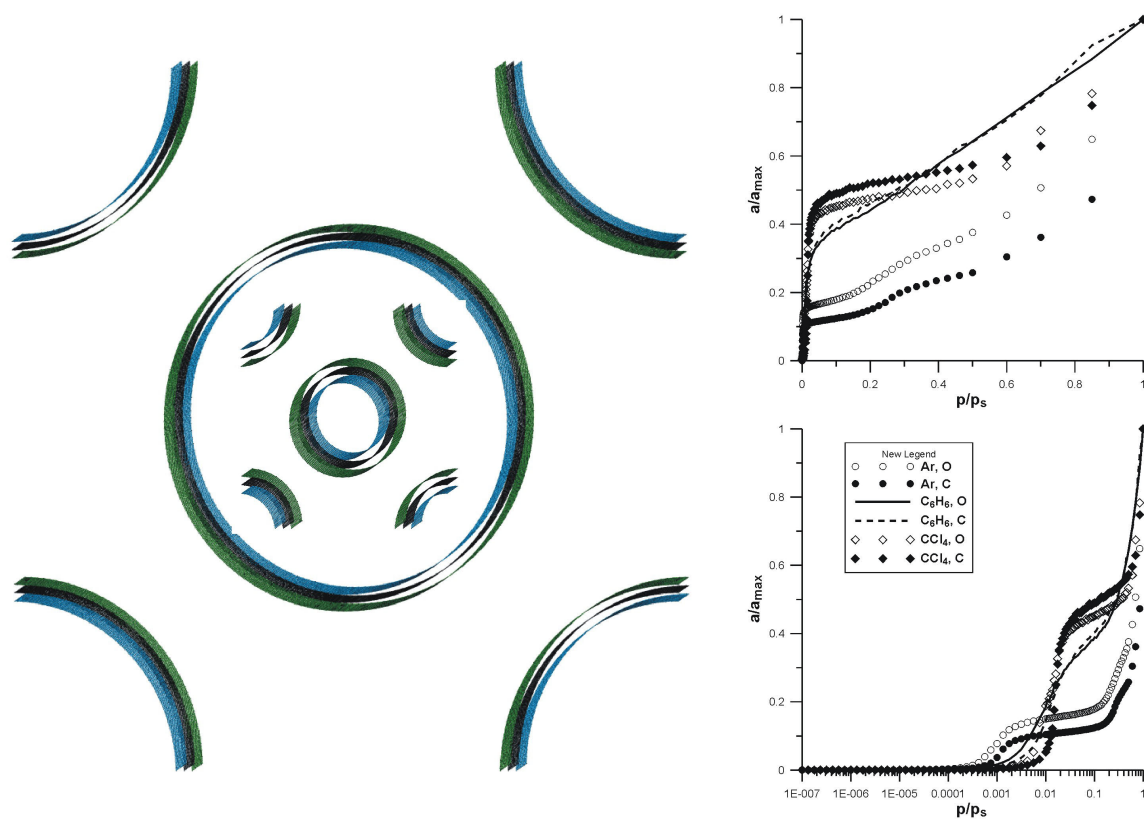

**Fig. S1.** Simulation box for the reference system ( $l_{box} = 26.0$  nm) using for  $\alpha_s$  construction (in order to compare the dimensions of the studied systems with the reference one in the internal tube of the reference system the largest studied bundle (i.e.,  $l_{box} = 8.0$  nm) is shown). Additionally, adsorption isotherms of Ar,  $C_6H_6$ , and  $CCl_4$  on the reference bundles of closed and opened multiwalled carbon nanotubes are presented.

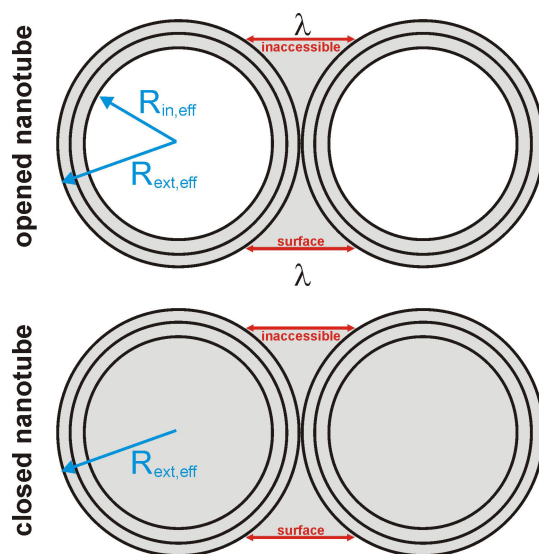

**Fig. S2.** The procedure of calculation of the absolute geometric surface area.

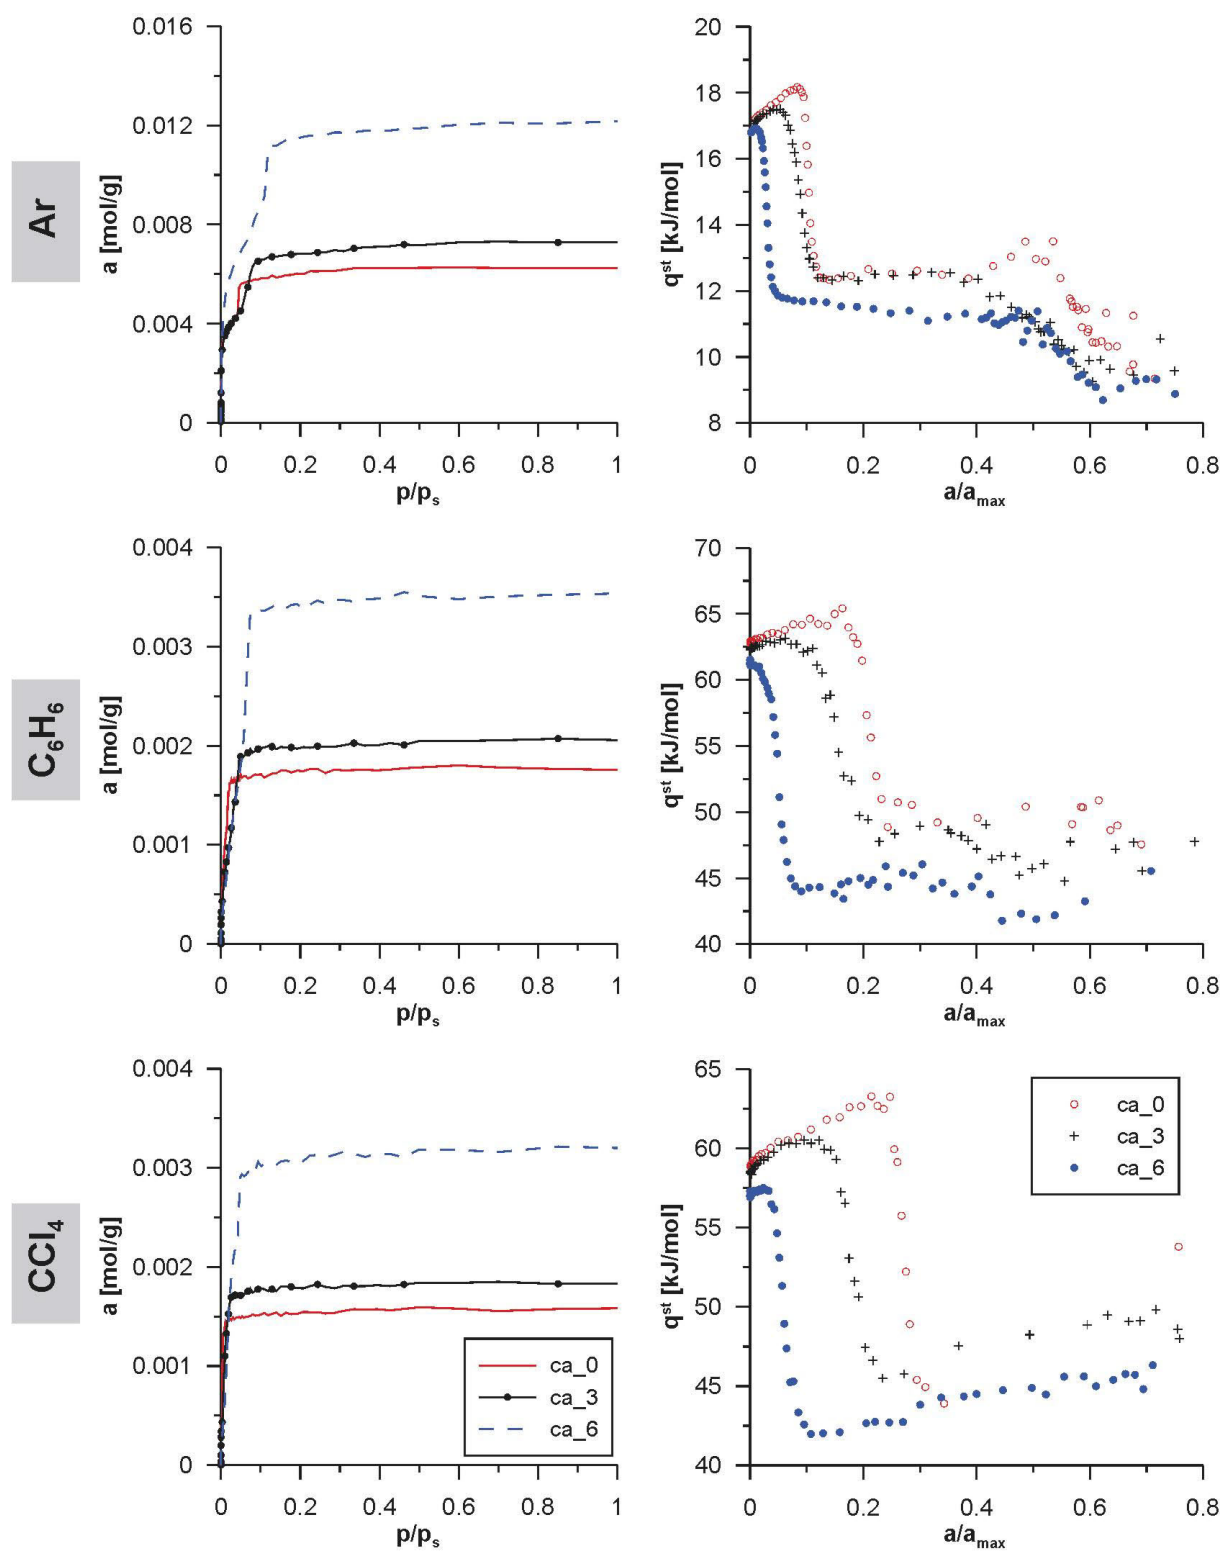

**Fig. S3.** Simulated isotherms and isosteric adsorption enthalpy plots for C<sub>62</sub> structures. Ar was simulated for the T = 87 K, C<sub>6</sub>H<sub>6</sub> and CCl<sub>4</sub> for 298 K.

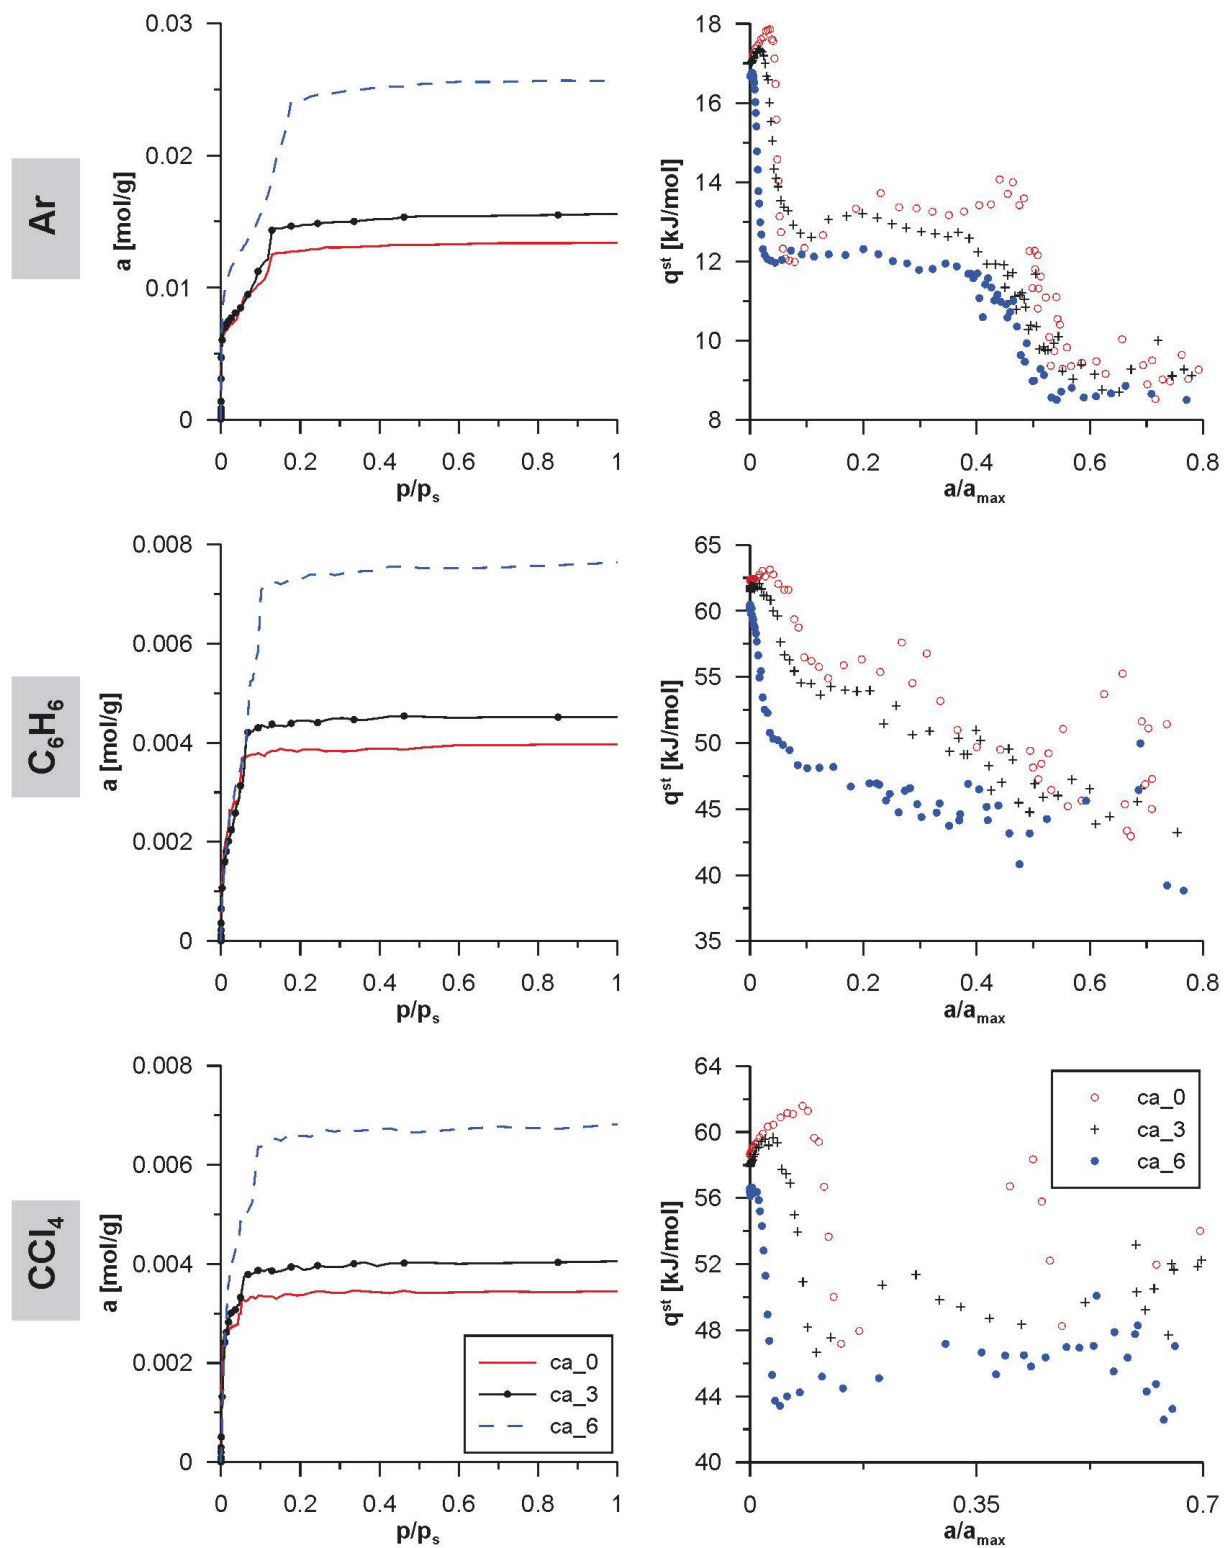

Fig. S4. Simulated isotherms and isosteric adsorption enthalpy plots for O<sub>62</sub> structures.

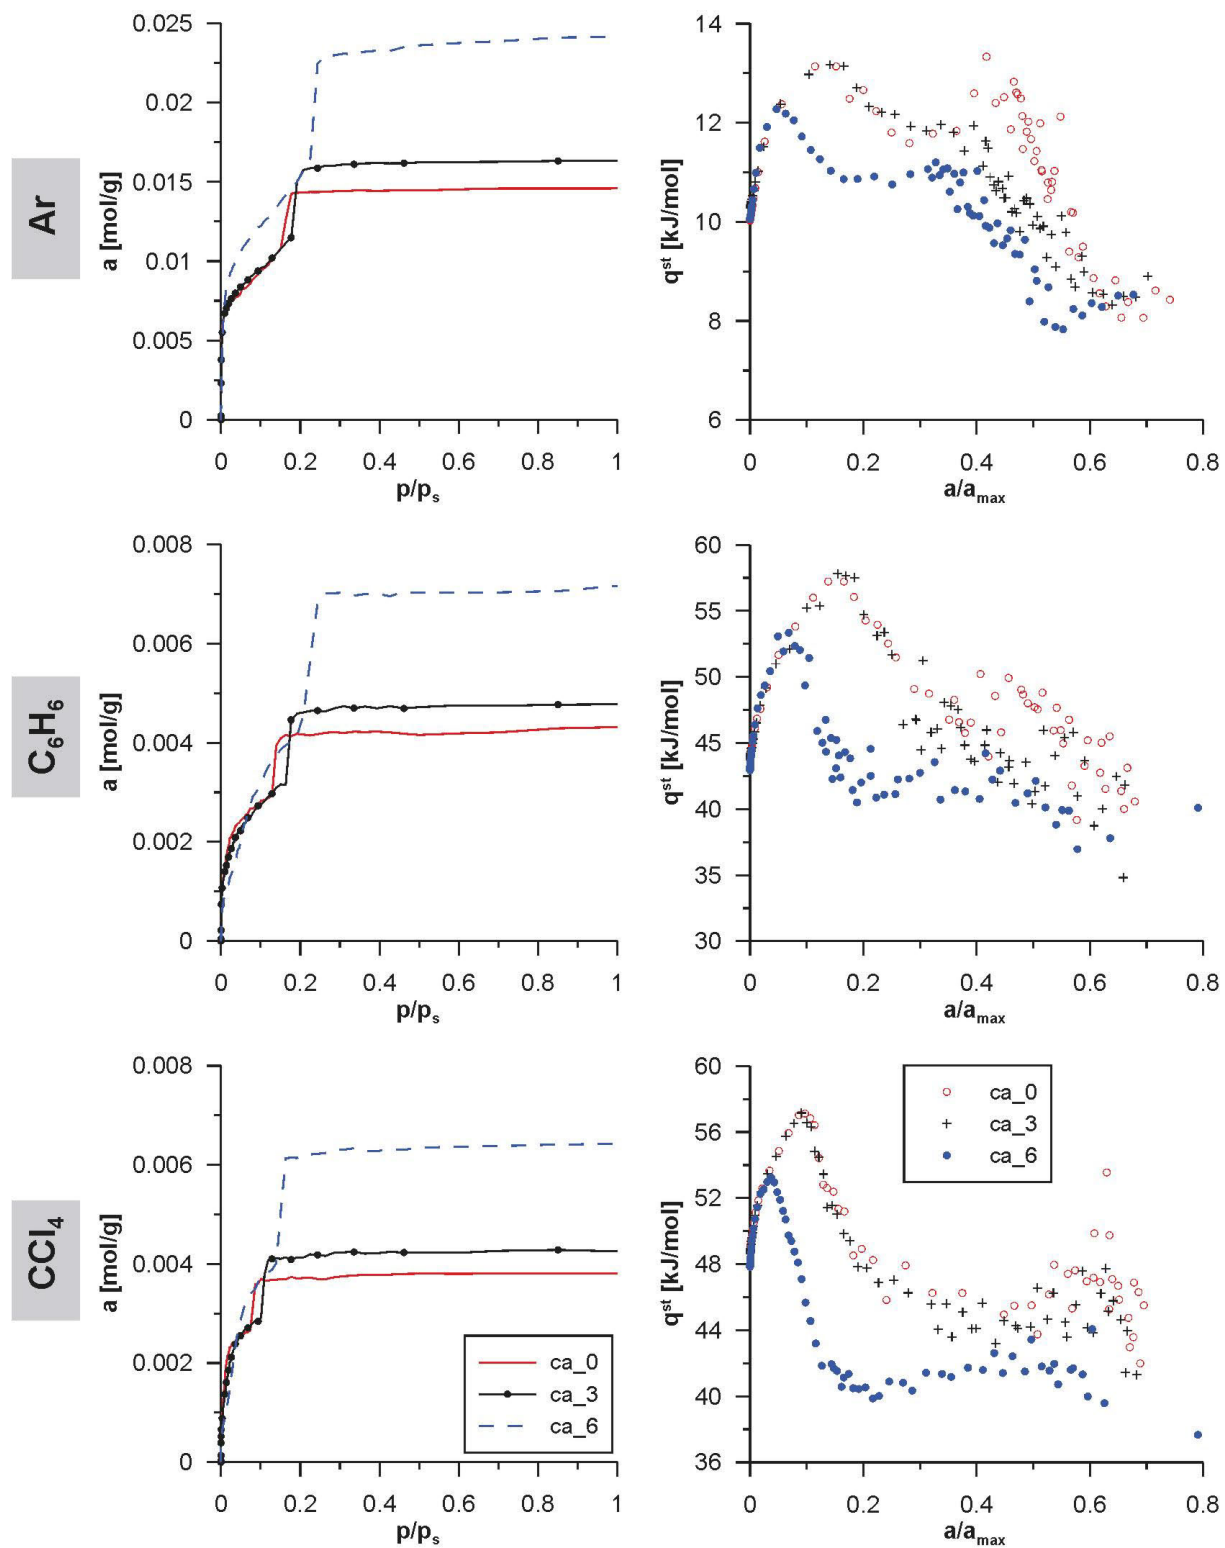

Fig. S5. Simulated isotherms and isosteric adsorption enthalpy plots for  $C_{70}$  structures.



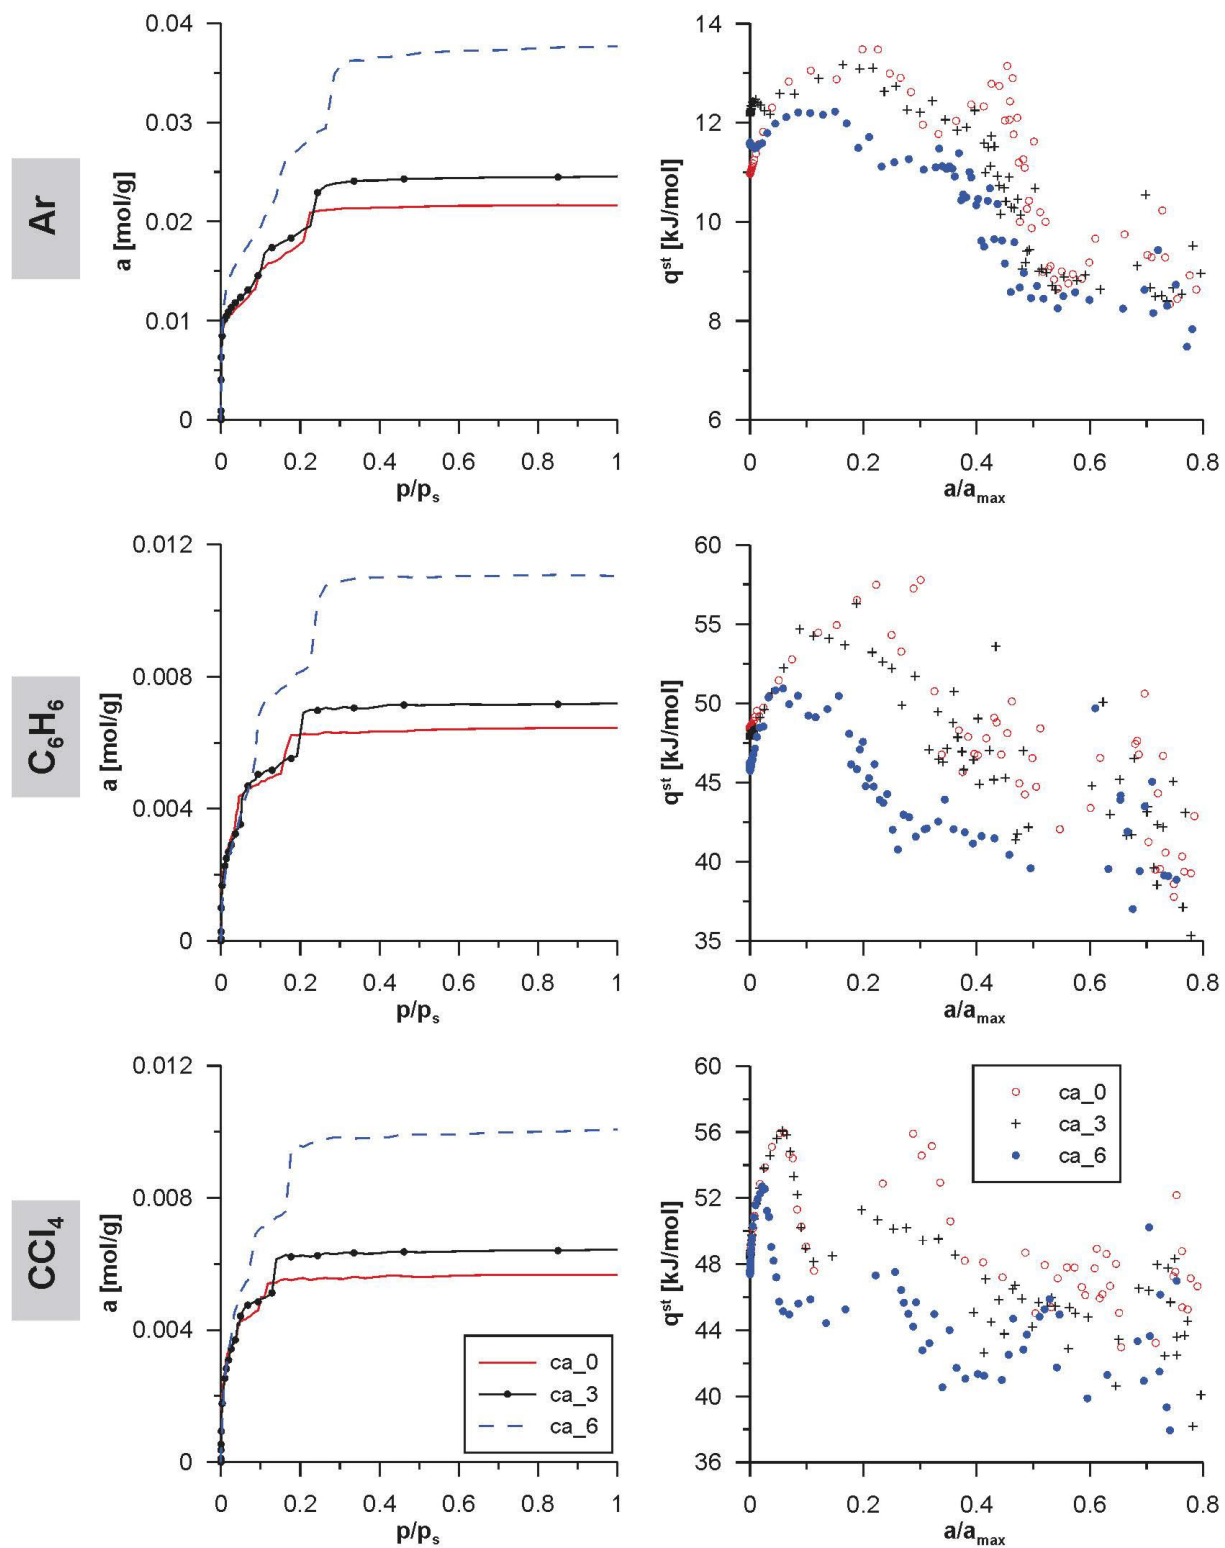

Fig. S6. Simulated isotherms and isosteric adsorption enthalpy plots for O<sub>70</sub> structures.

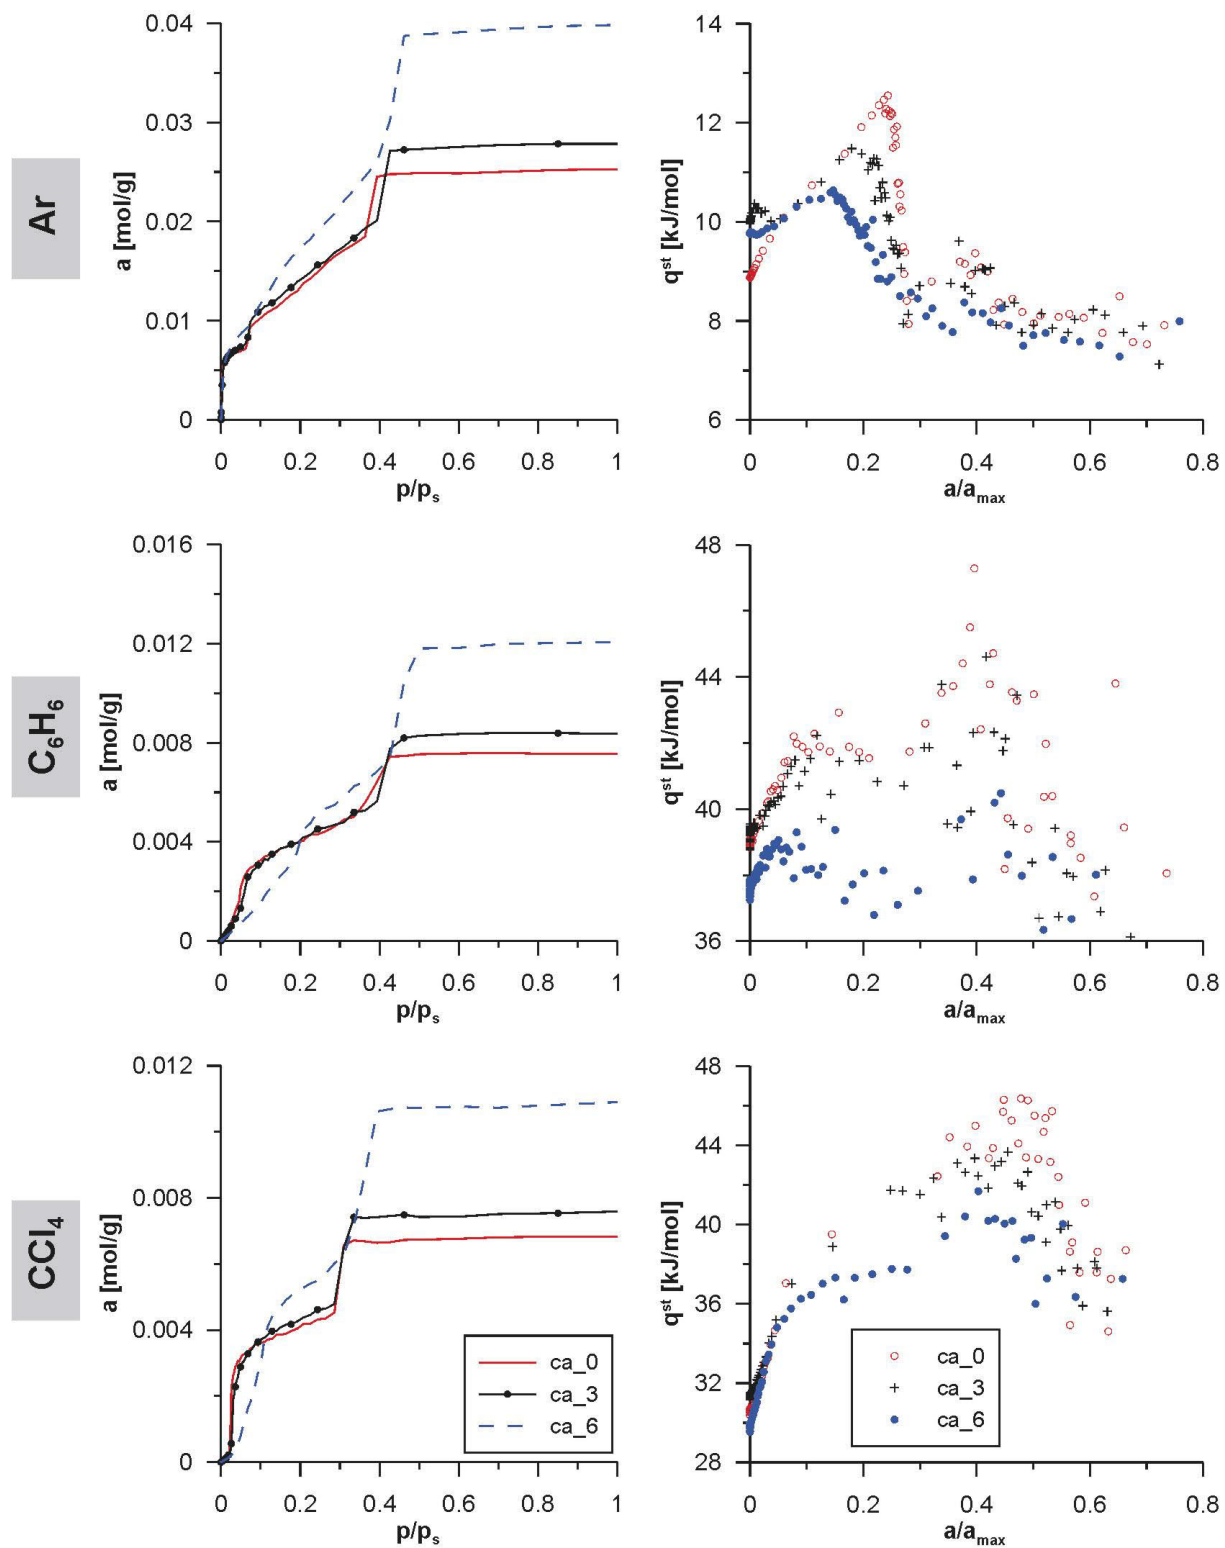

Fig. S7. Simulated isotherms and isosteric adsorption enthalpy plots for C<sub>80</sub> structures.

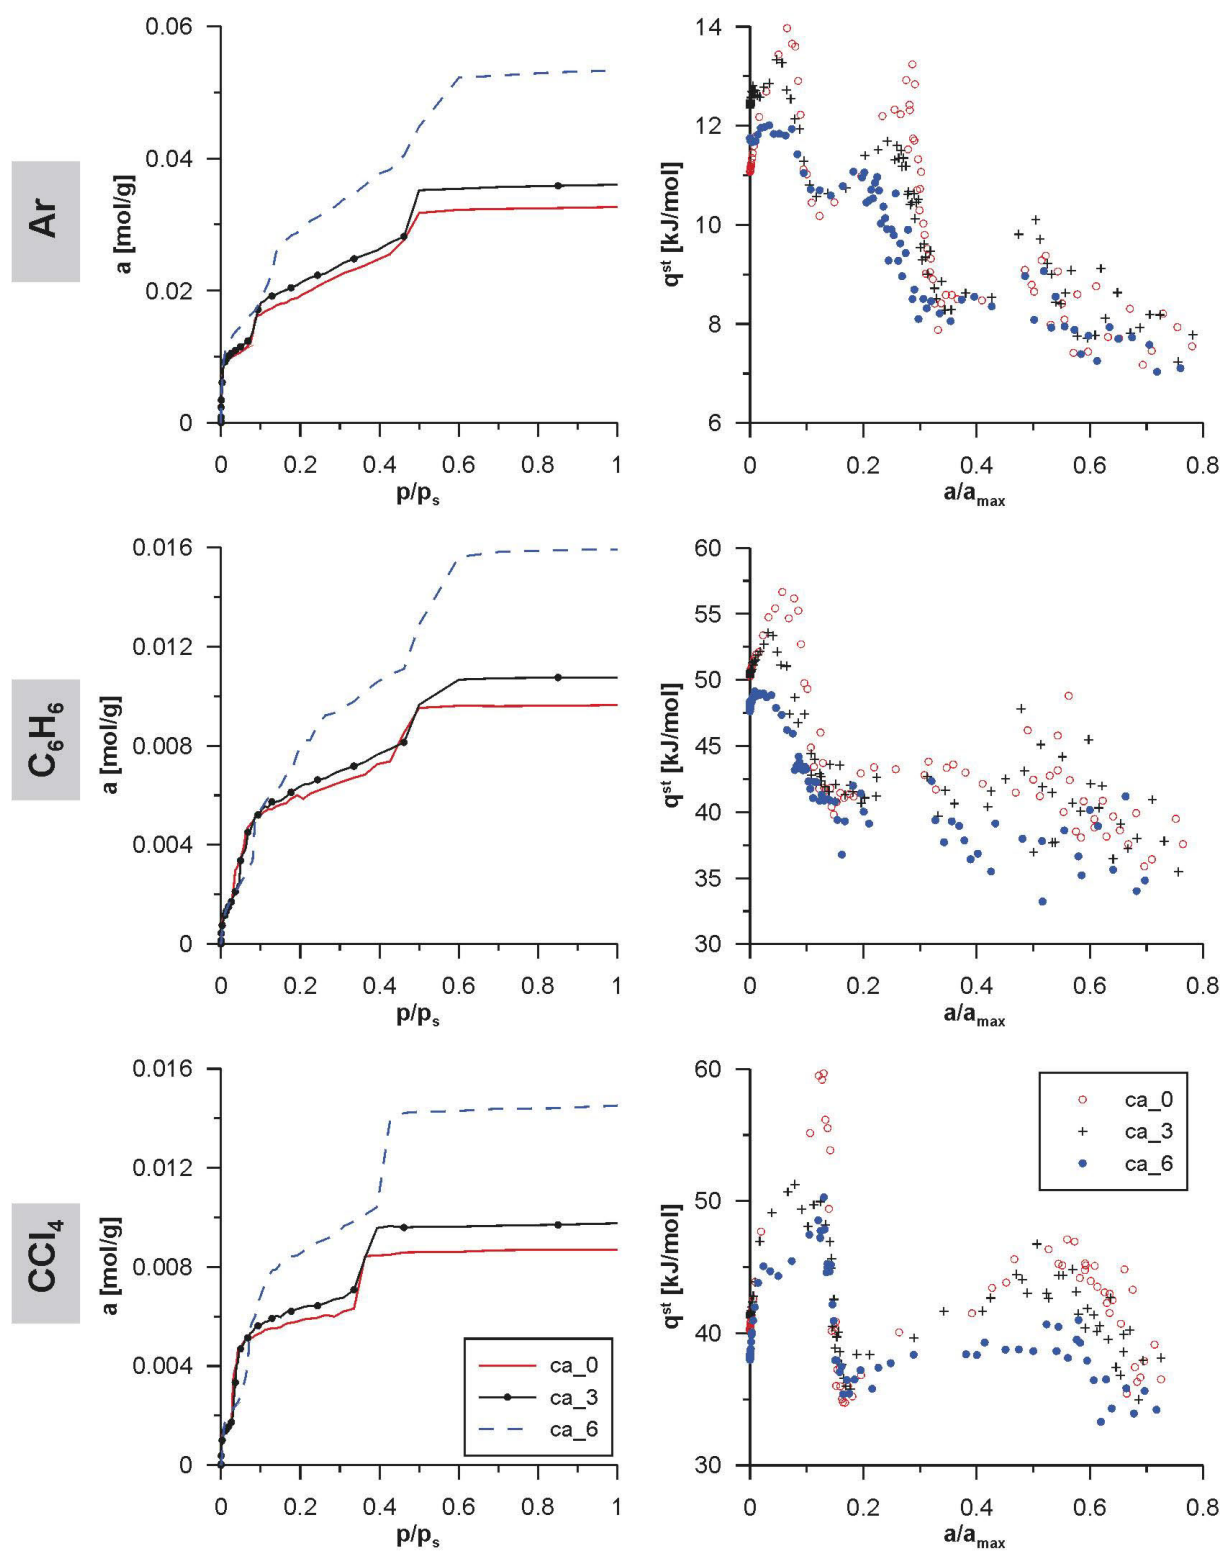

Fig. S8. Simulated isotherms and isosteric adsorption enthalpy plots for O<sub>80</sub> structures.

**Table S1.** The values of the parameters applied in simulations.

| <i>Molecule</i>          | <i>Centre</i>           | $\sigma$ [nm] | $\epsilon/k_B$ [K] | <i>Reference</i>                  |
|--------------------------|-------------------------|---------------|--------------------|-----------------------------------|
| <i>Ar</i>                | <i>Ar</i>               | 0.3405        | 119.8              | 36                                |
| <i>CCl<sub>4</sub></i>   | <i>C</i>                | 0.46          | 39.0               | 37                                |
|                          | <i>Cl</i>               | 0.35          | 105.0              |                                   |
| <i>Benzene</i>           | <i>ua</i> <sup>*)</sup> | 0.3246        | 89.4               | 38                                |
| <i>Carbon structures</i> | <i>C</i>                | 0.34          | 28.0               | 40, 41 and the references therein |

<sup>\*)</sup> – united atom

**Tables S2.** The values of the  $\alpha_s$  for swings on simulated isotherms for the structure 62.

**C\_62\_ca\_0**

|   | Ar      | C <sub>6</sub> H <sub>6</sub> | CCl <sub>4</sub> |
|---|---------|-------------------------------|------------------|
| a | 0.00278 | 0.00734                       | 0.00522          |
| b | 0.0539  | 0.179                         | 0.572            |
| c | 0.501   | 0.492                         |                  |

**C\_62\_ca\_3**

|   | Ar      | C <sub>6</sub> H <sub>6</sub> | CCl <sub>4</sub> |
|---|---------|-------------------------------|------------------|
| a | 0.00278 | 0.0101                        | 0.00169          |
| b | 0.0539  | 0.253                         | 0.143            |
| c | 0.522   | 0.616                         | 0.748            |

**C\_62\_ca\_6**

|   | Ar      | C <sub>6</sub> H <sub>6</sub> | CCl <sub>4</sub> |
|---|---------|-------------------------------|------------------|
| a | 0.00206 | 0.0242                        | 0.00169          |
| b | 0.0539  | 0.379                         | 0.143            |
| c | 0.540   | 0.683                         | 0.836            |

**O\_62\_ca\_0**

|   | Ar      | C <sub>6</sub> H <sub>6</sub> | CCl <sub>4</sub> |
|---|---------|-------------------------------|------------------|
| a | 0.00293 | 0.00272                       | 0.00256          |
| b | 0.118   | 0.0396                        | 0.0162           |
| c | 0.505   | 0.494                         | 0.0527           |
| d | 0.570   | 0.609                         | 0.857            |

**O\_62\_ca\_3**

|   | Ar      | C <sub>6</sub> H <sub>6</sub> | CCl <sub>4</sub> |
|---|---------|-------------------------------|------------------|
| a | 0.00293 | 0.0396                        | 0.00256          |
| b | 0.0661  | 0.632                         | 0.0229           |
| c | 0.536   |                               | 0.466            |
| d | 0.570   |                               | 0.857            |

**O\_62\_ca\_6**

|   | Ar      | C <sub>6</sub> H <sub>6</sub> | CCl <sub>4</sub> |
|---|---------|-------------------------------|------------------|
| a | 0.00398 | 0.0113                        | 0.00624          |
| b | 0.235   | 0.678                         | 0.0330           |
| c | 0.640   |                               | 0.559            |
| d |         |                               | 0.897            |

**Tables S3.** The values of the  $\alpha_s$  for swings on simulated isotherms for the structure 70.

**C\_70\_ca\_0**

|   | Ar     | C <sub>6</sub> H <sub>6</sub> | CCl <sub>4</sub> |
|---|--------|-------------------------------|------------------|
| a | 0.0357 | 0.0467                        | 0.00306          |
| b | 0.603  | 0.757                         | 0.0952           |
| c |        |                               | 0.884            |

**C\_70\_ca\_3**

|   | Ar     | C <sub>6</sub> H <sub>6</sub> | CCl <sub>4</sub> |
|---|--------|-------------------------------|------------------|
| a | 0.0357 | 0.0467                        | 0.00228          |
| b | 0.510  | 0.670                         | 0.0952           |
| c | 0.650  | 0.802                         | 0.897            |

**C\_70\_ca\_6**

|   | Ar     | C <sub>6</sub> H <sub>6</sub> | CCl <sub>4</sub> |
|---|--------|-------------------------------|------------------|
| a | 0.0357 | 0.0467                        | 0.0139           |
| b | 0.493  | 0.683                         | 0.927            |
| c | 0.727  | 0.868                         |                  |

**O\_70\_ca\_0**

|   | Ar     | C <sub>6</sub> H <sub>6</sub> | CCl <sub>4</sub> |
|---|--------|-------------------------------|------------------|
| a | 0.0661 | 0.0537                        | 0.00189          |
| b | 0.551  | 0.587                         | 0.0330           |
| c | 0.737  | 0.750                         | 0.521            |
| d |        |                               | 0.901            |

**O\_70\_ca\_3**

|   | Ar    | C <sub>6</sub> H <sub>6</sub> | CCl <sub>4</sub> |
|---|-------|-------------------------------|------------------|
| a | 0.118 | 0.0537                        | 0.00256          |
| b | 0.562 | 0.632                         | 0.0527           |
| c | 0.770 | 0.750                         | 0.521            |
| d |       |                               | 0.857            |
| e |       |                               | 0.921            |

**O\_70\_ca\_6**

|   | Ar    | C <sub>6</sub> H <sub>6</sub> | CCl <sub>4</sub> |
|---|-------|-------------------------------|------------------|
| a | 0.118 | 0.0775                        | 0.00344          |
| b | 0.617 | 0.680                         | 0.0527           |
| c | 0.855 | 0.848                         | 0.441            |
| d |       |                               | 0.820            |
| e |       |                               | 0.901            |
| f |       |                               | 0.954            |

**Tables S4.** The values of the  $\alpha_s$  for swings on simulated isotherms for the structure 80.

**C\_80\_ca\_0**

|   | Ar    | C <sub>6</sub> H <sub>6</sub> | CCl <sub>4</sub> |
|---|-------|-------------------------------|------------------|
| a | 0.390 | 0.179                         | 0.114            |
| b | 0.603 | 0.720                         | 0.748            |
| c | 1.00  | 1.05                          | 0.982            |

**C\_80\_ca\_3**

|   | Ar     | C <sub>6</sub> H <sub>6</sub> | CCl <sub>4</sub> |
|---|--------|-------------------------------|------------------|
| a | 0.0539 | 0.757                         | 0.220            |
| b | 0.434  | 1.05                          | 0.836            |
| c | 1.03   |                               | 0.982            |

**C\_80\_ca\_6**

|   | Ar     | C <sub>6</sub> H <sub>6</sub> | CCl <sub>4</sub> |
|---|--------|-------------------------------|------------------|
| a | 0.0539 | 0.746                         | 0.897            |
| b | 0.584  | 0.851                         | 1.01             |
| c | 1.07   | 1.13                          |                  |

**O\_80\_ca\_0**

|   | Ar     | C <sub>6</sub> H <sub>6</sub> | CCl <sub>4</sub> |
|---|--------|-------------------------------|------------------|
| a | 0.0277 | 0.0396                        | 0.0162           |
| b | 0.424  | 0.574                         | 0.844            |
| c | 0.551  | 0.708                         | 0.995            |
| d | 1.14   | 1.12                          |                  |

**O\_80\_ca\_3**

|   | Ar     | C <sub>6</sub> H <sub>6</sub> | CCl <sub>4</sub> |
|---|--------|-------------------------------|------------------|
| a | 0.0417 | 0.0396                        | 0.0330           |
| b | 0.460  | 0.597                         | 0.869            |
| c | 0.551  | 0.714                         | 1.00             |
| d | 0.737  | 1.12                          |                  |
| e | 1.14   |                               |                  |

**O\_80\_ca\_6**

|   | Ar     | C <sub>6</sub> H <sub>6</sub> | CCl <sub>4</sub> |
|---|--------|-------------------------------|------------------|
| a | 0.0661 | 0.0537                        | 0.104            |
| b | 0.617  | 0.678                         | 0.441            |
| c | 0.737  | 0.818                         | 0.921            |
| d | 1.00   | 1.25                          | 1.03             |
| e | 1.14   |                               |                  |

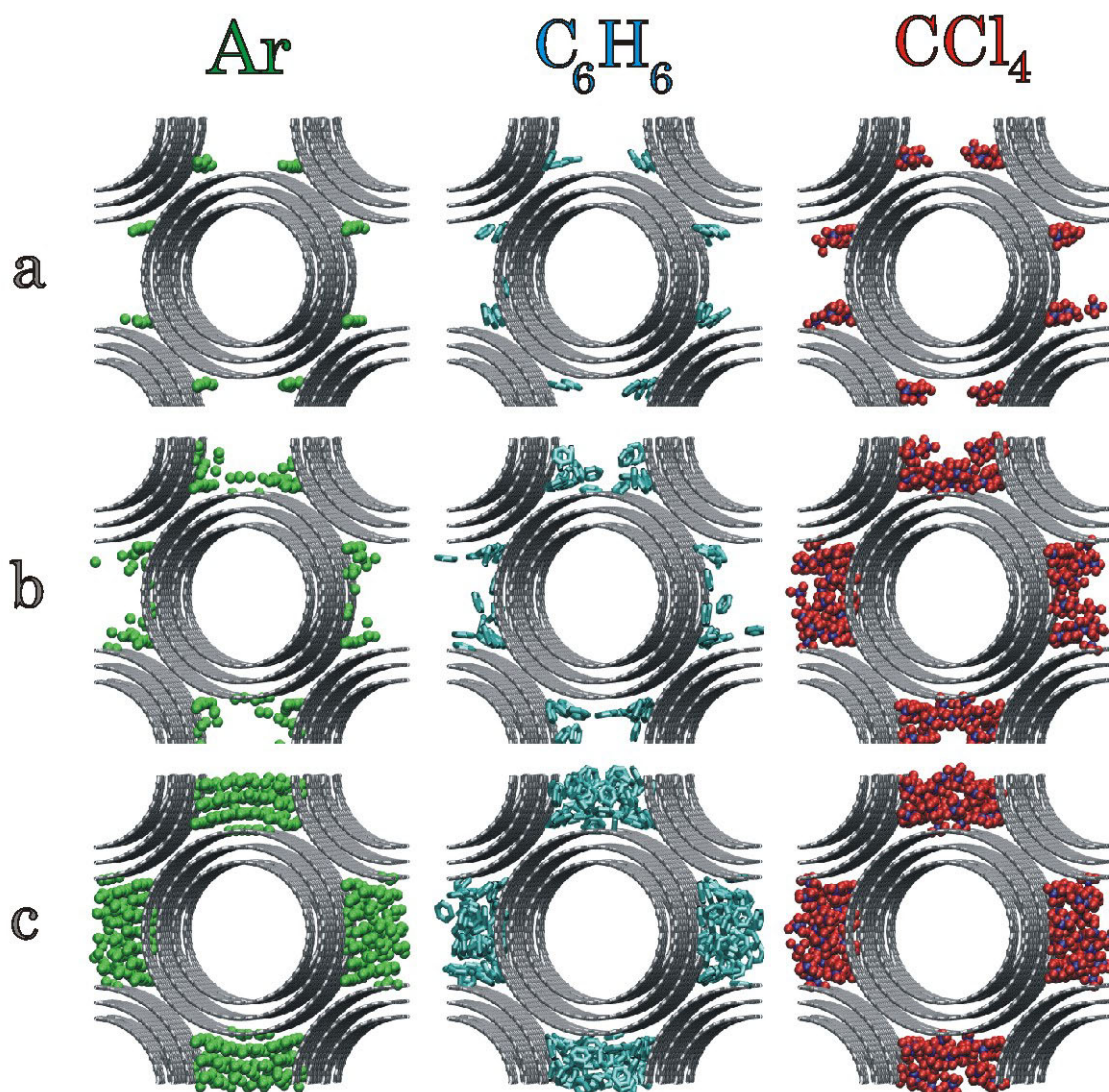

**Fig. S9.** Snapshots for C<sub>62</sub>ca<sub>3</sub> structure in relation to the swings appearing on the  $\alpha_s$ -plots (the  $\alpha_s$  values for *a* – *c* swings are tabulated in tables S2).



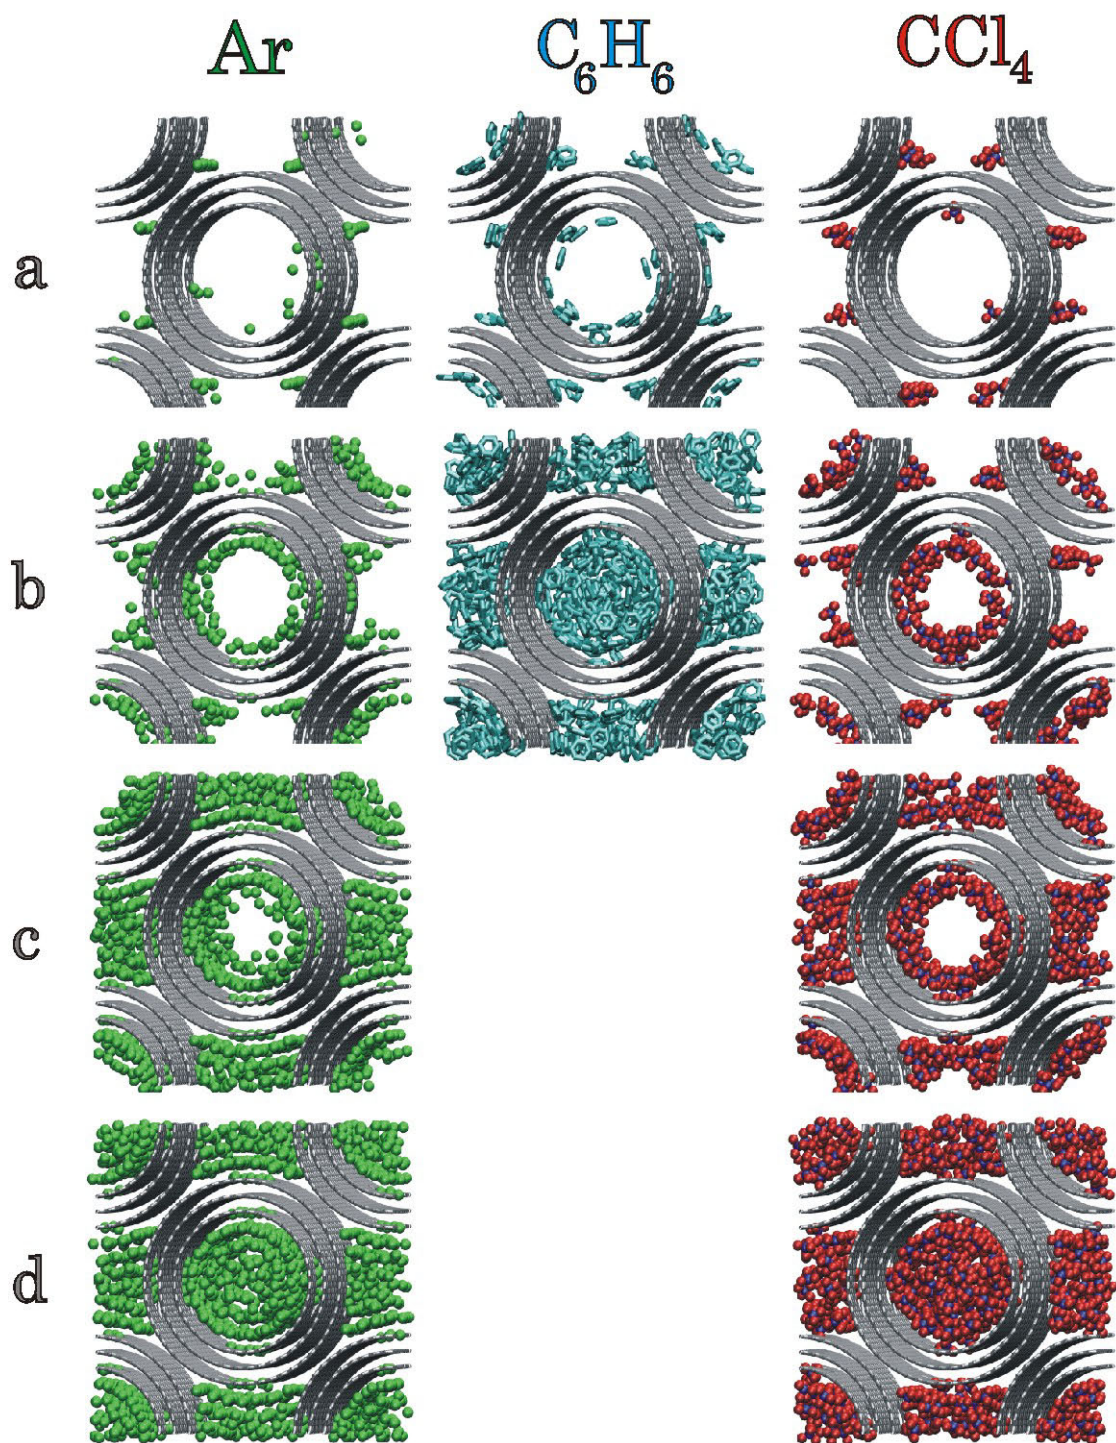

**Fig. S10.** Snapshots for O\_62\_ca\_3 structure in relation to the swings appearing on the  $\alpha_s$ -plots (the  $\alpha_s$  values for *a* – *d* swings are tabulated in tables S2).

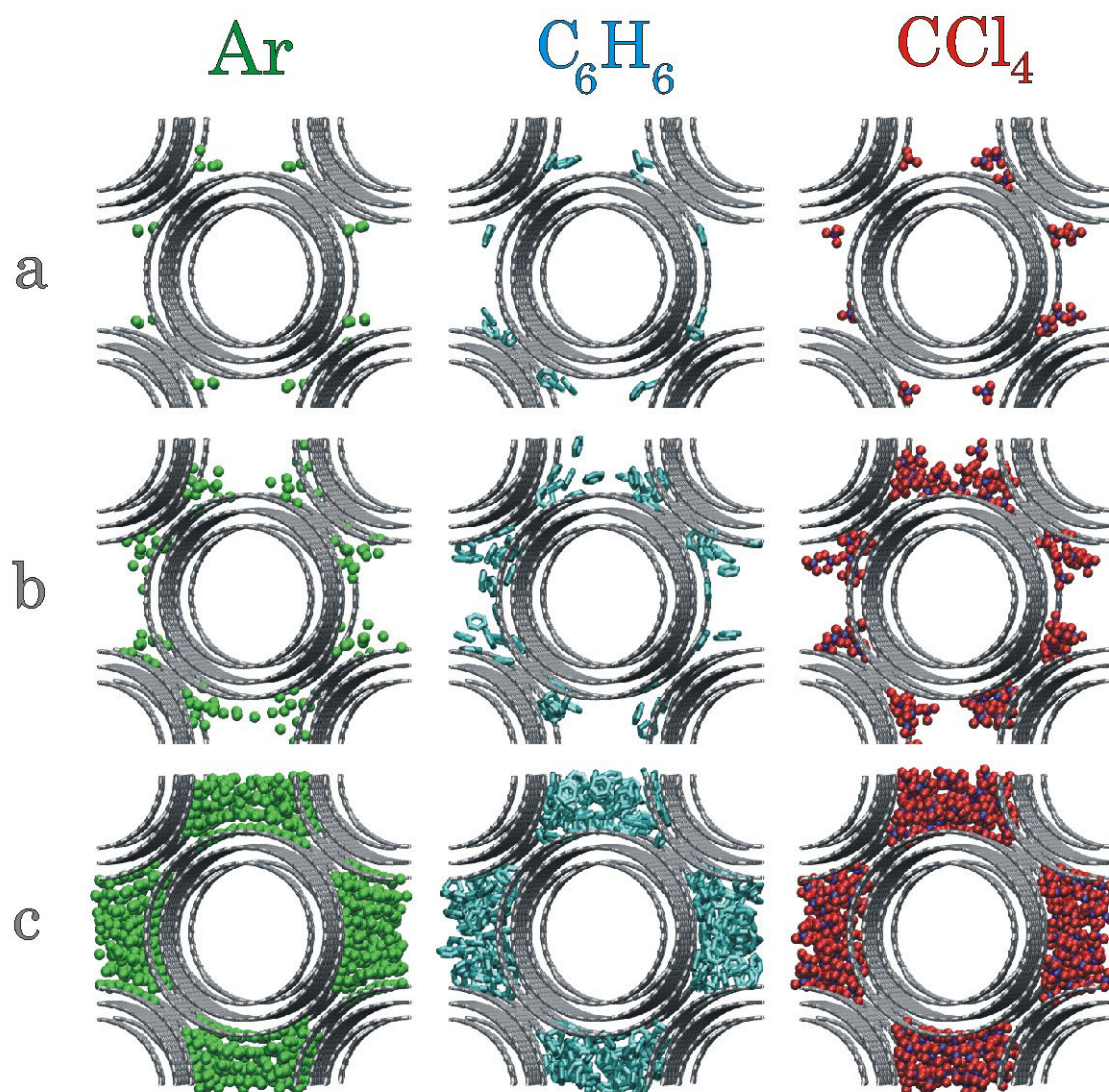

**Fig. S11.** Snapshots for C<sub>62</sub>ca<sub>6</sub> structure in relation to the swings appearing on the  $\alpha_s$ -plots (the  $\alpha_s$  values for *a* – *c* swings are tabulated in tables S2).



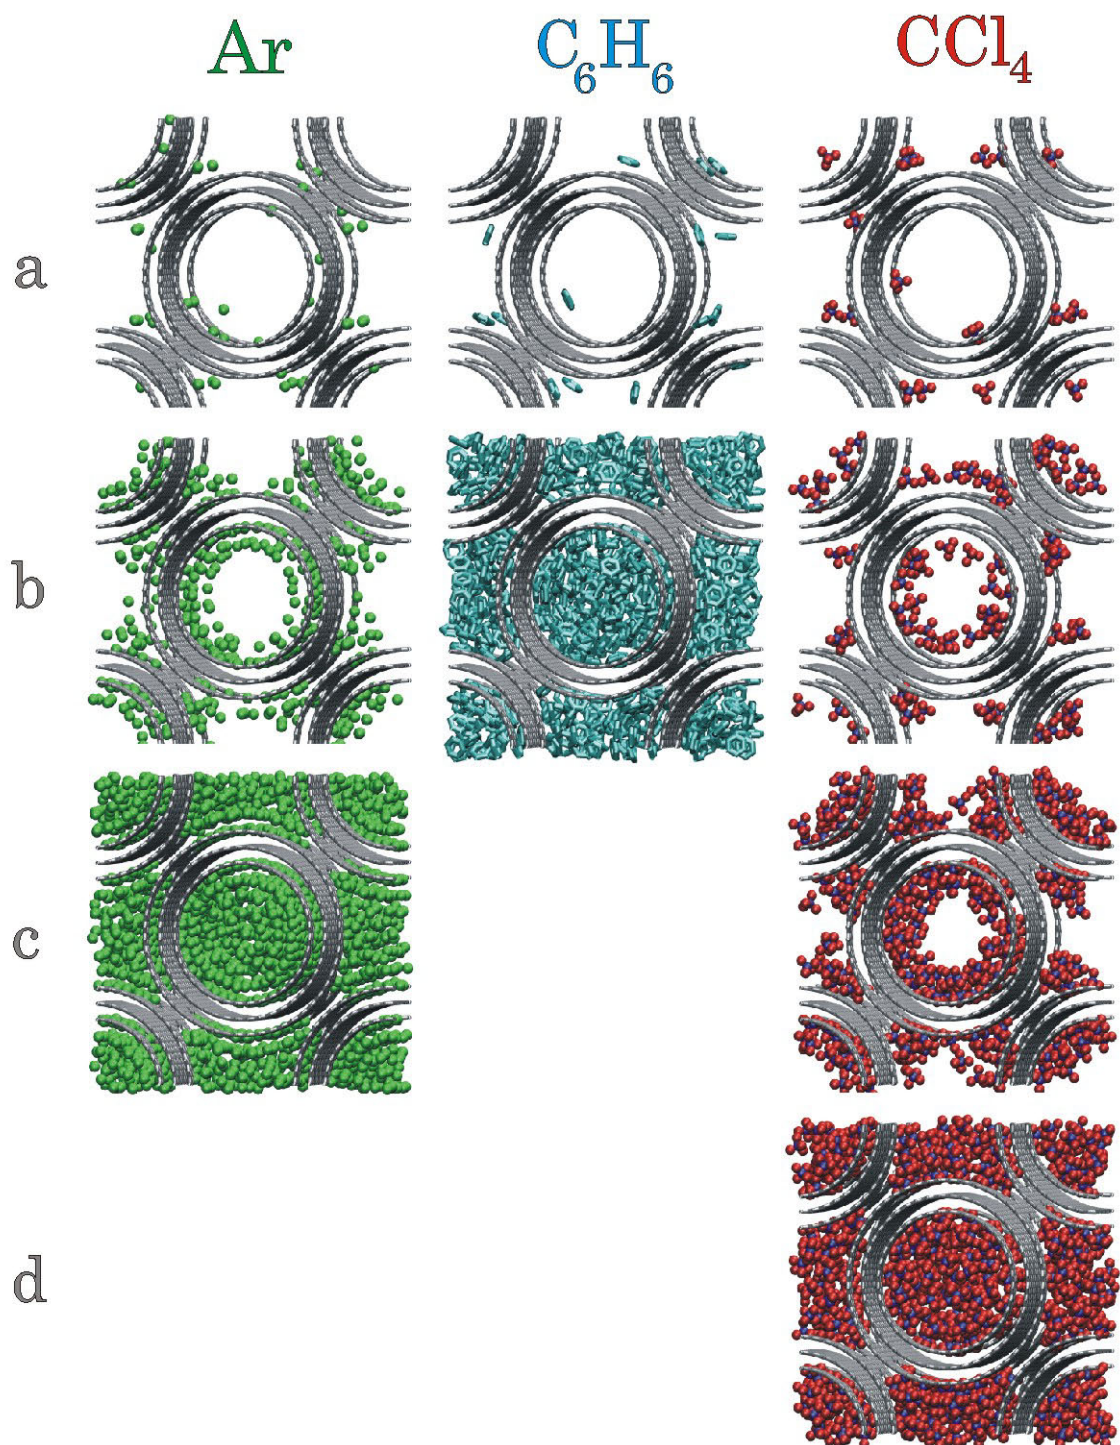

**Fig. S12.** Snapshots for O\_62\_ca\_6 structure in relation to the swings appearing on the  $\alpha_s$ -plots (the  $\alpha_s$  values for  $a - d$  swings are tabulated in tables S2).

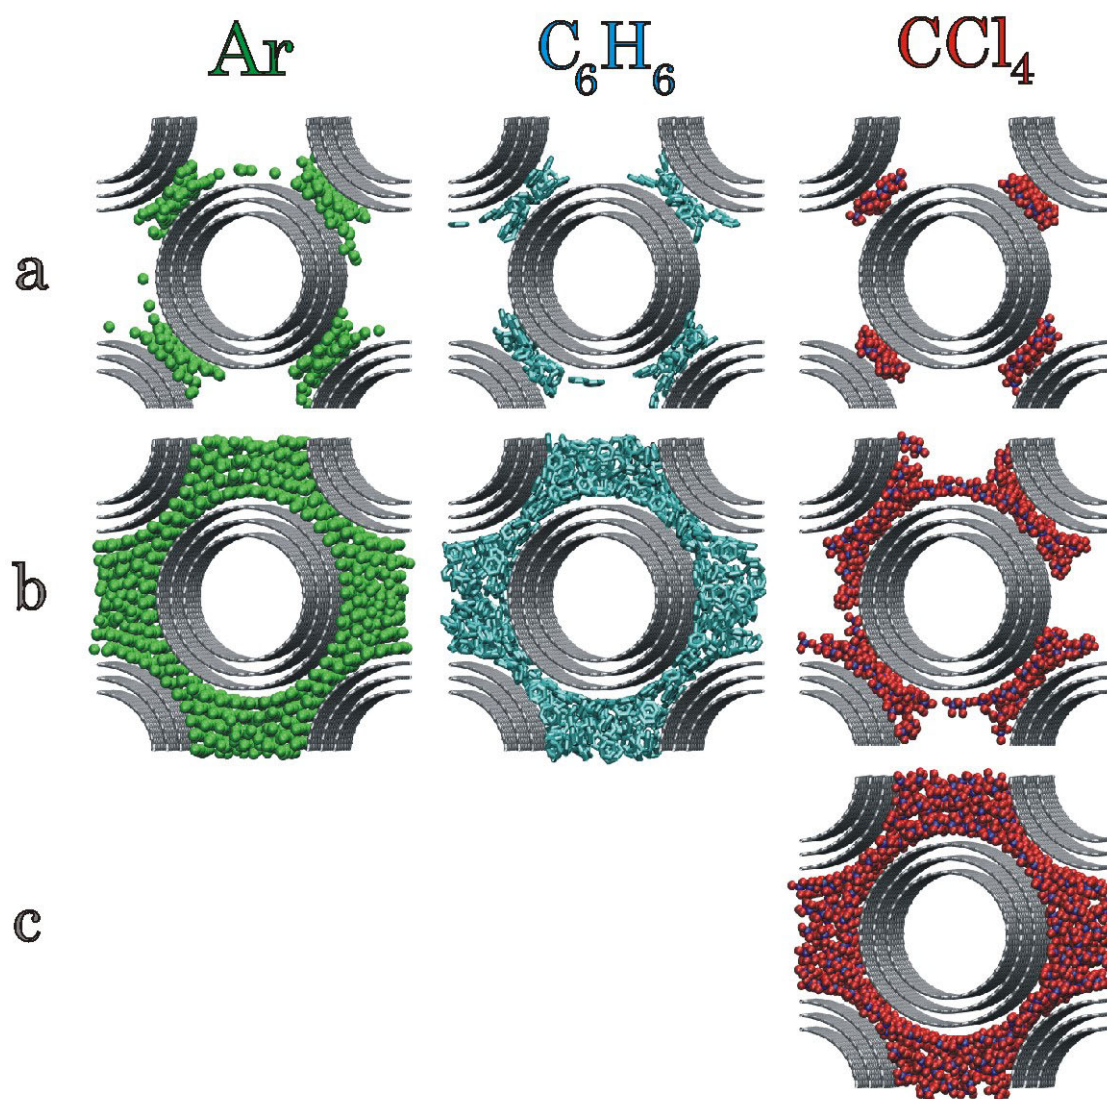

**Fig. S13.** Snapshots for C<sub>70</sub>\_ca\_0 structure in relation to the swings appearing on the  $\alpha_s$ -plots (the  $\alpha_s$  values for *a* – *c* swings are tabulated in tables S3).



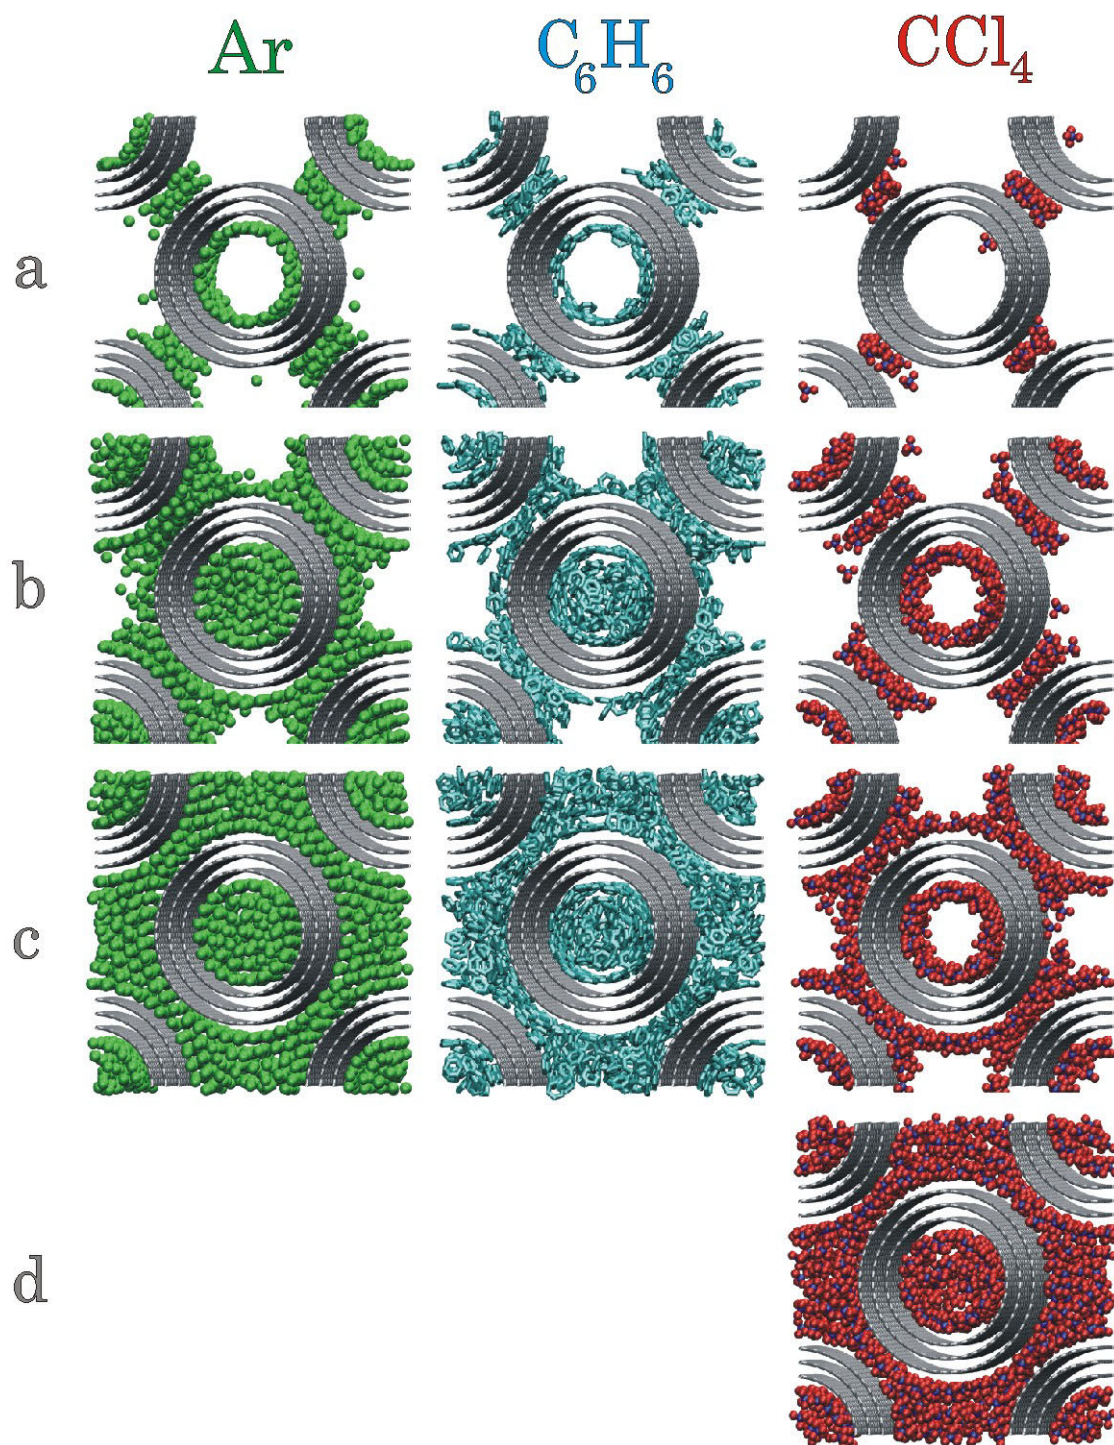

**Fig. S14.** Snapshots for O\_70\_ca\_0 structure in relation to the swings appearing on the  $\alpha_s$ -plots (the  $\alpha_s$  values for  $a - d$  swings are tabulated in tables S3).

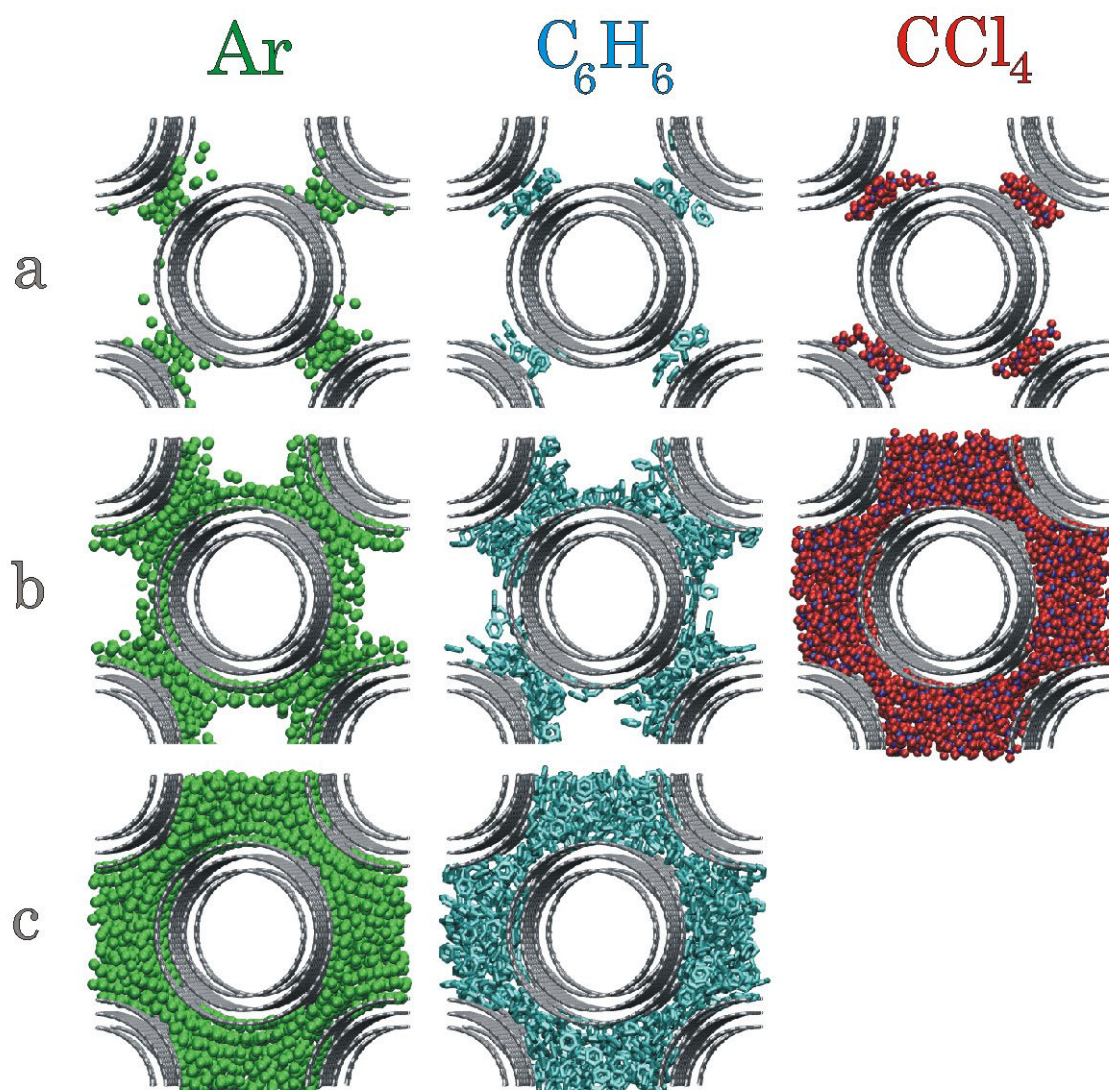

**Fig. S15.** Snapshots for C\_70\_ca\_6 structure in relation to the swings appearing on the  $\alpha_s$ -plots (the  $\alpha_s$  values for *a – c* swings are tabulated in tables S3).



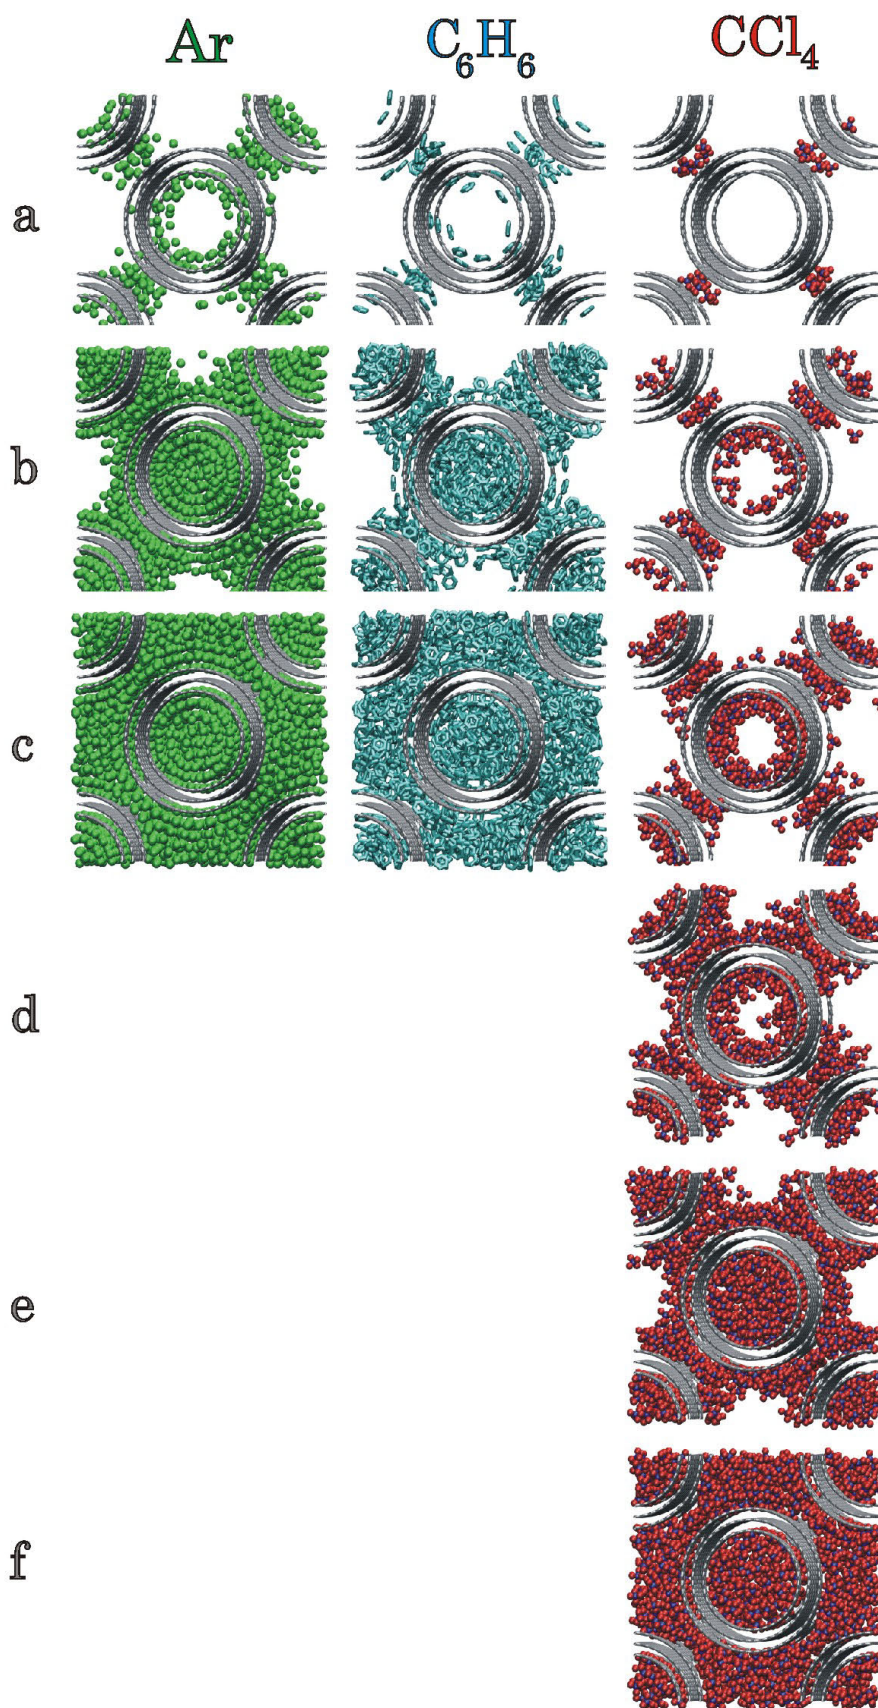

**Fig. S16.** Snapshots for O\_70\_ca\_6 structure in relation to the swings appearing on the  $\alpha_s$ -plots (the  $\alpha_s$  values for  $a-f$  swings are tabulated in tables S3).



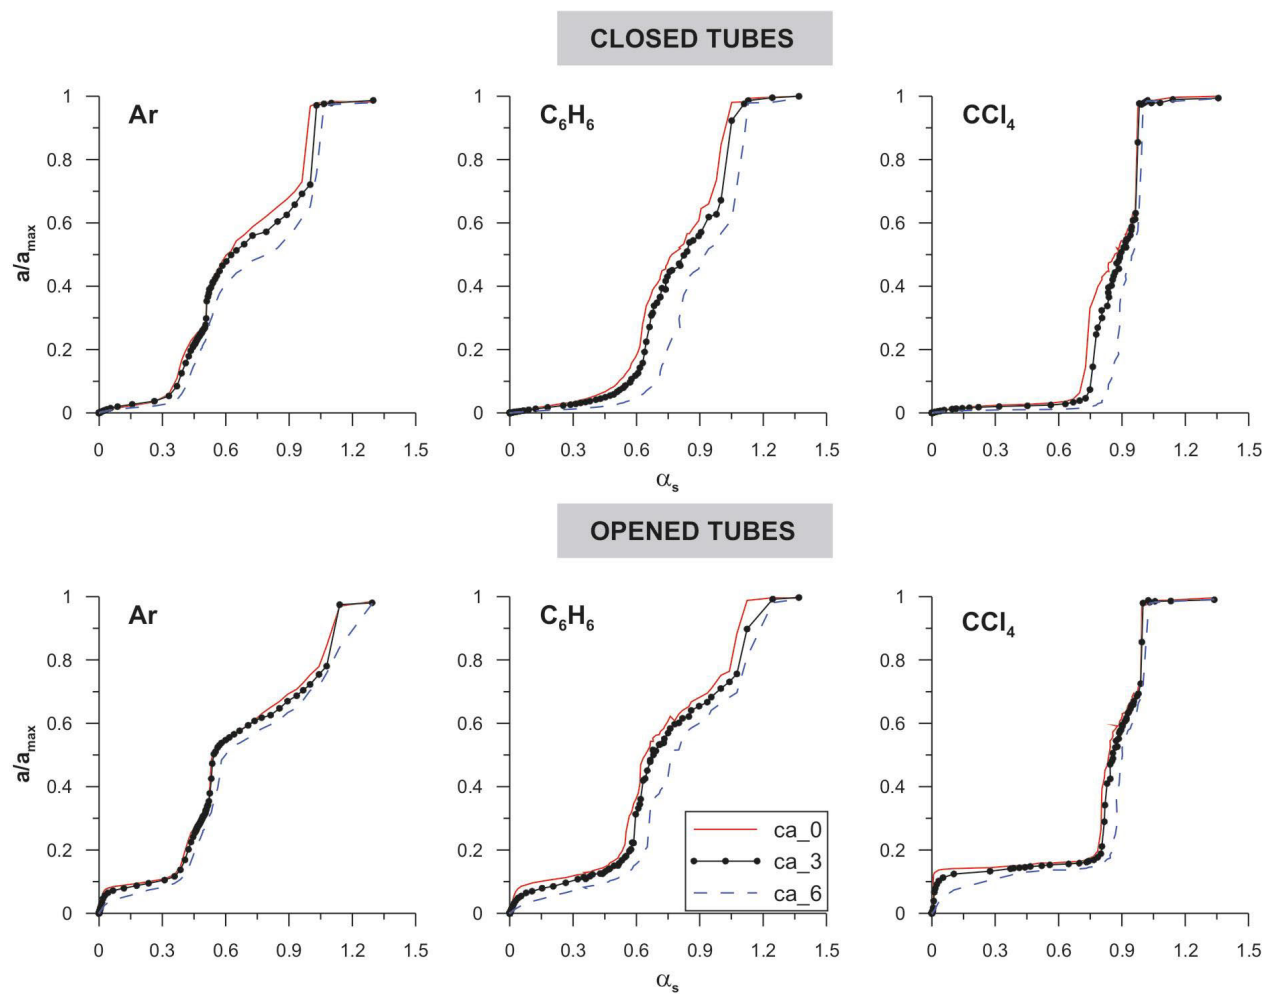

**Fig. S17.** High resolution  $\alpha_s$ -plots for adsorption in the structures 80

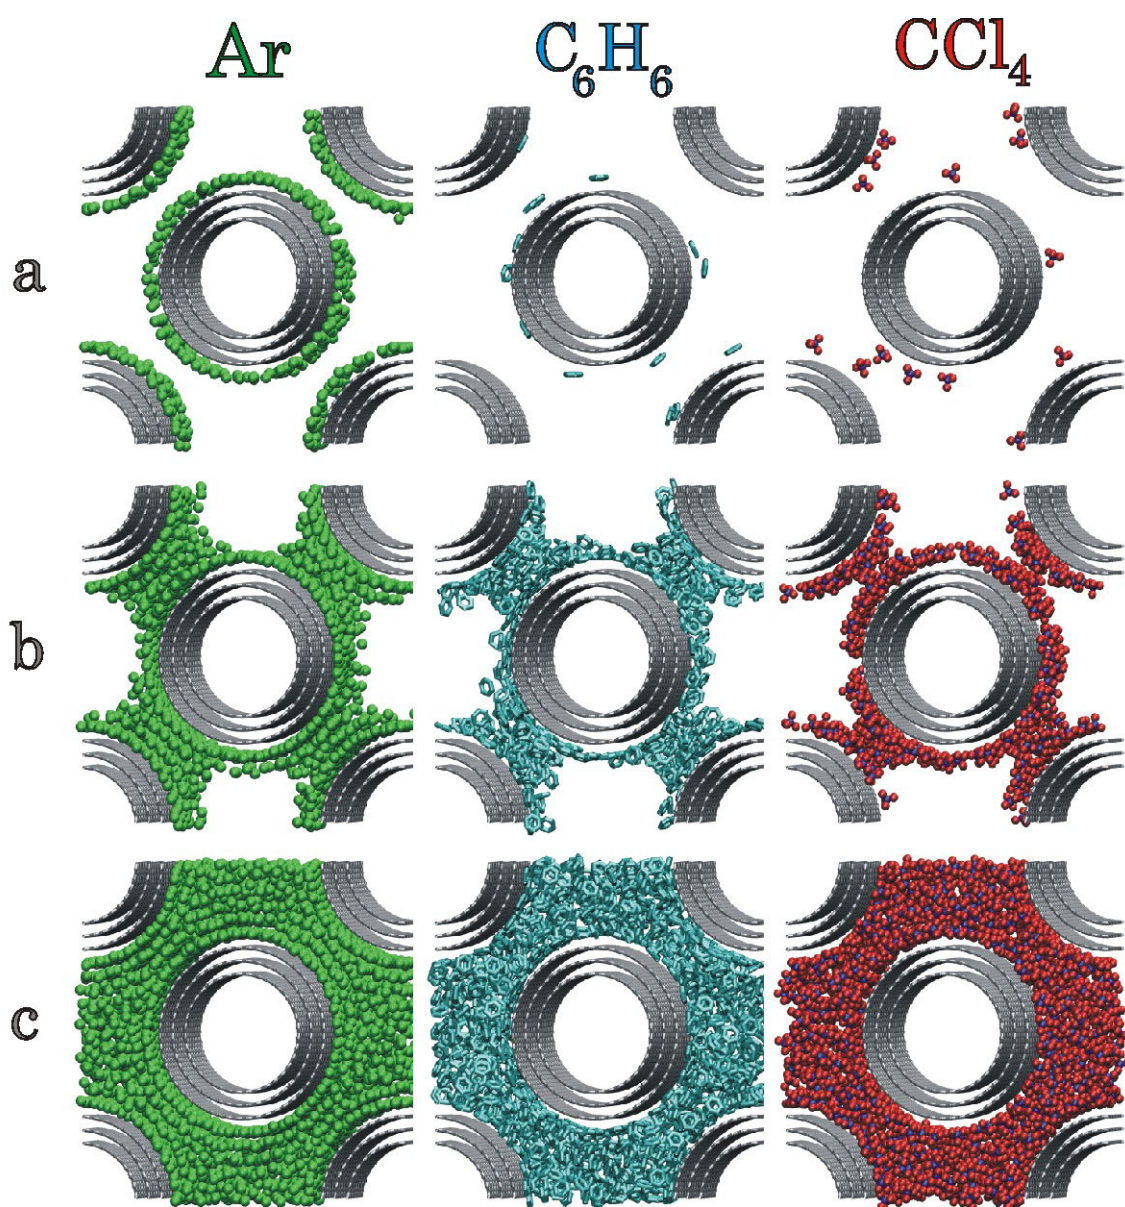

**Fig. S18.** Snapshots for C<sub>80</sub>ca\_0 structure in relation to the swings appearing on the  $\alpha_s$ -plots (the  $\alpha_s$  values for *a* – *c* swings are tabulated in tables S4).



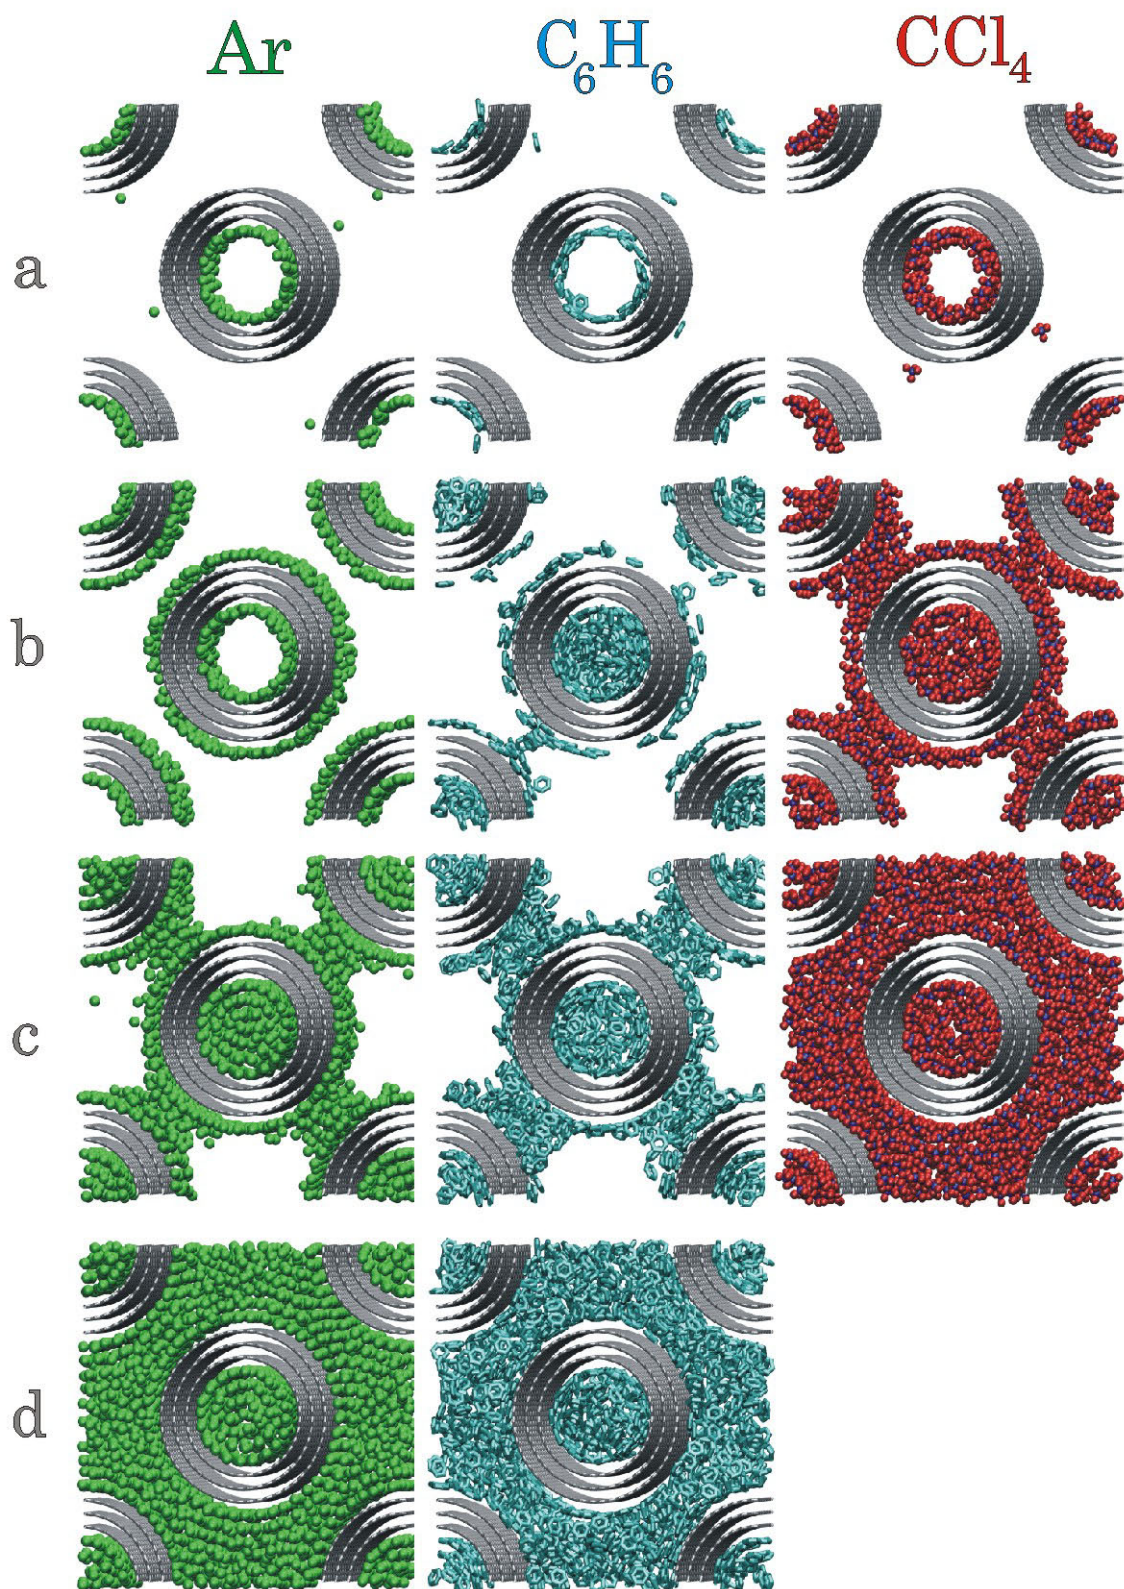

**Fig. S19.** Snapshots for O\_80\_ca\_0 structure in relation to the swings appearing on the  $\alpha_s$ -plots (the  $\alpha_s$  values for *a* – *d* swings are tabulated in tables S4).



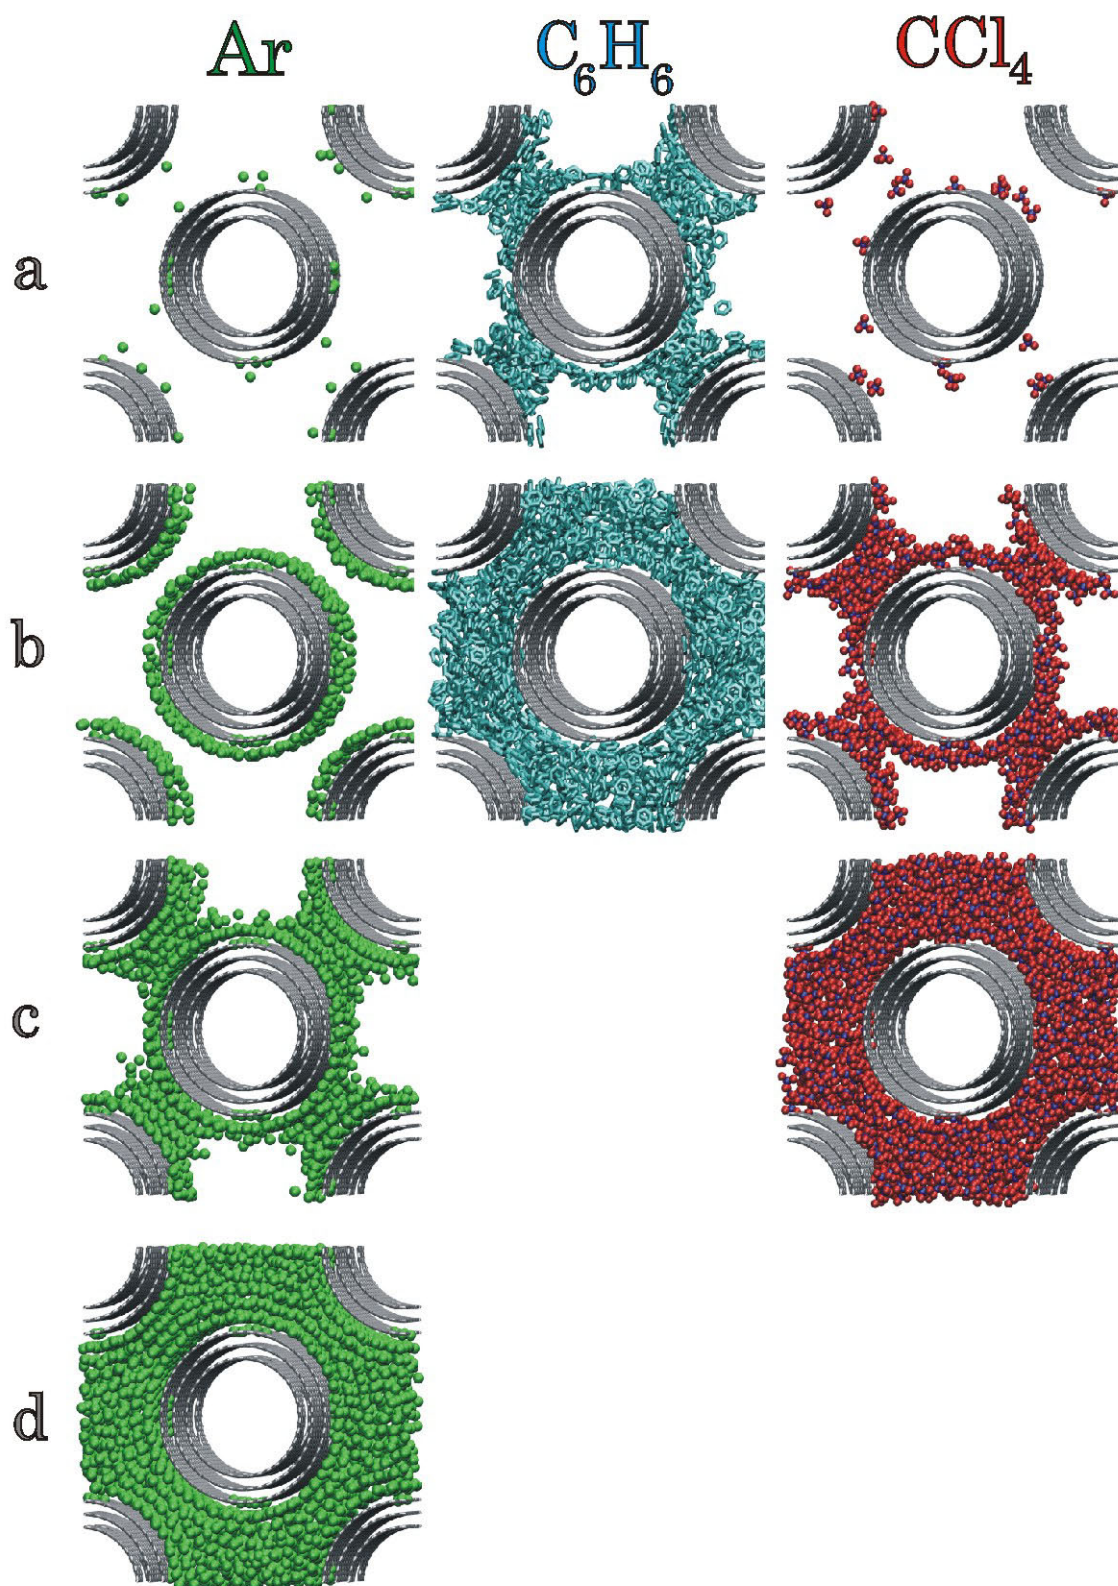

**Fig. S20.** Snapshots for C<sub>80</sub> ca\_3 structure in relation to the swings appearing on the  $\alpha_s$ -plots (the  $\alpha_s$  values for a – d swings are tabulated in tables S4).

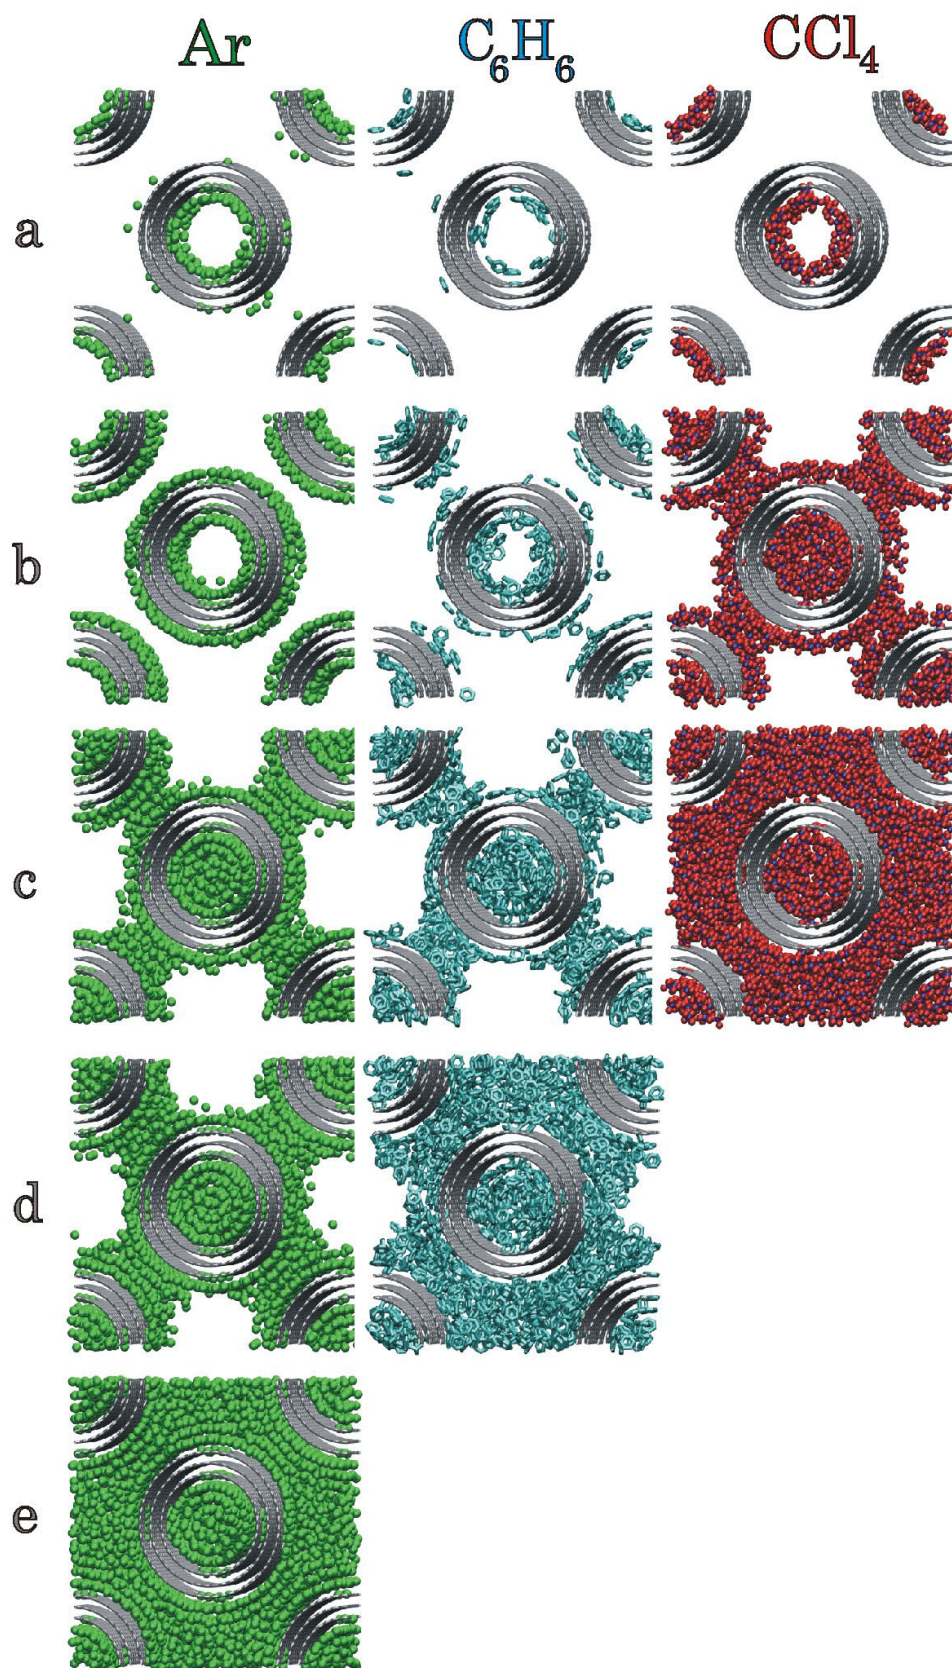

**Fig. S21.** Snapshots for O\_80\_ca\_3 structure in relation to the swings appearing on the  $\alpha_s$ -plots (the  $\alpha_s$  values for *a – e* swings are tabulated in tables S4).



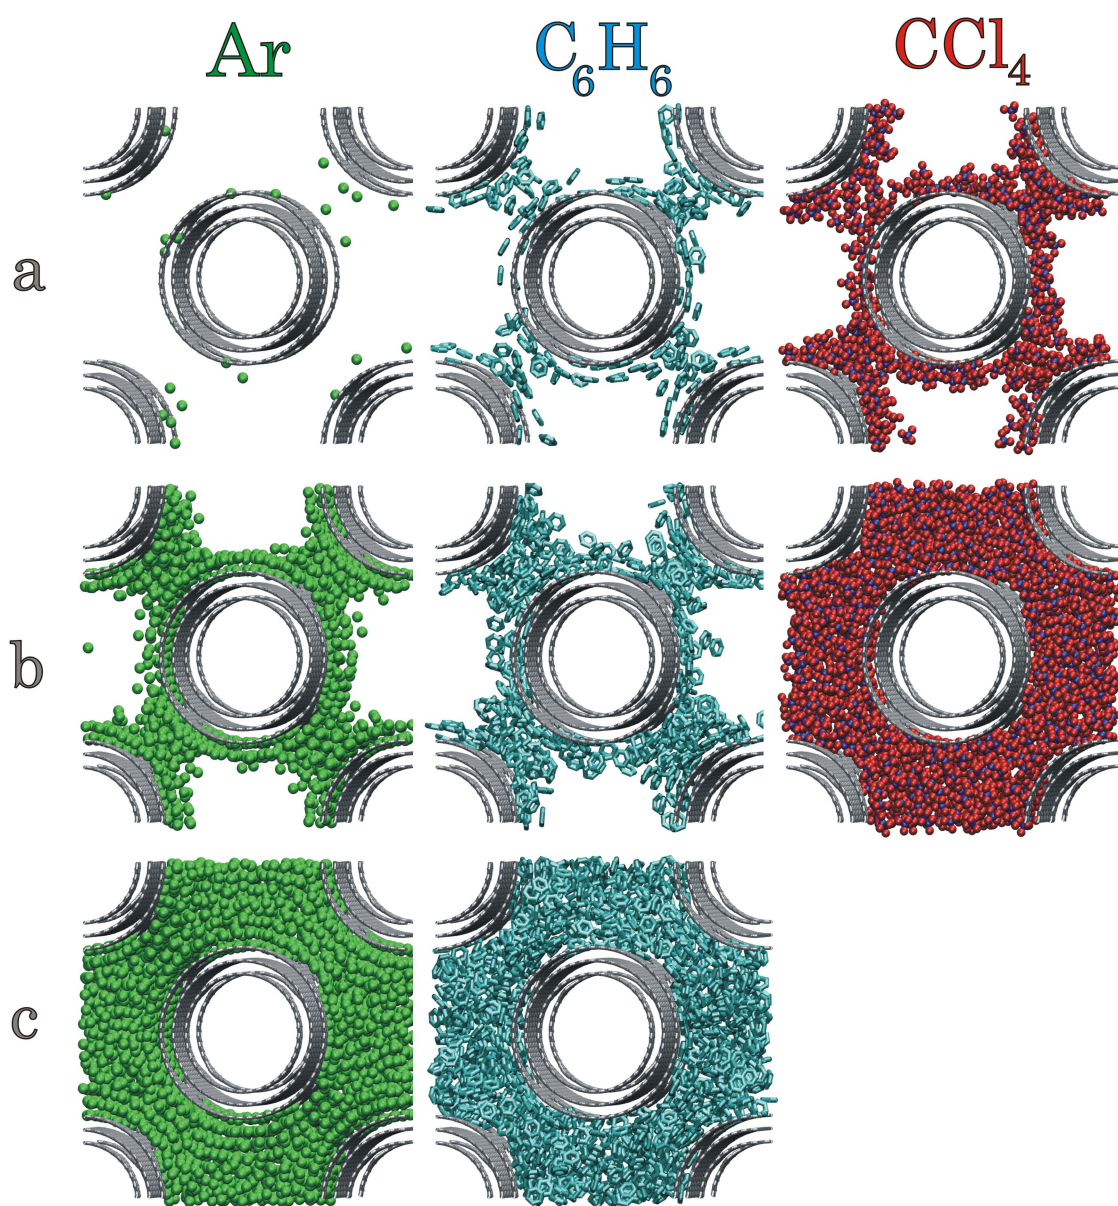

**Fig. S22.** Snapshots for C<sub>80</sub>ca<sub>6</sub> structure in relation to the swings appearing on the  $\alpha_s$ -plots (the  $\alpha_s$  values for *a* – *c* swings are tabulated in tables S4).

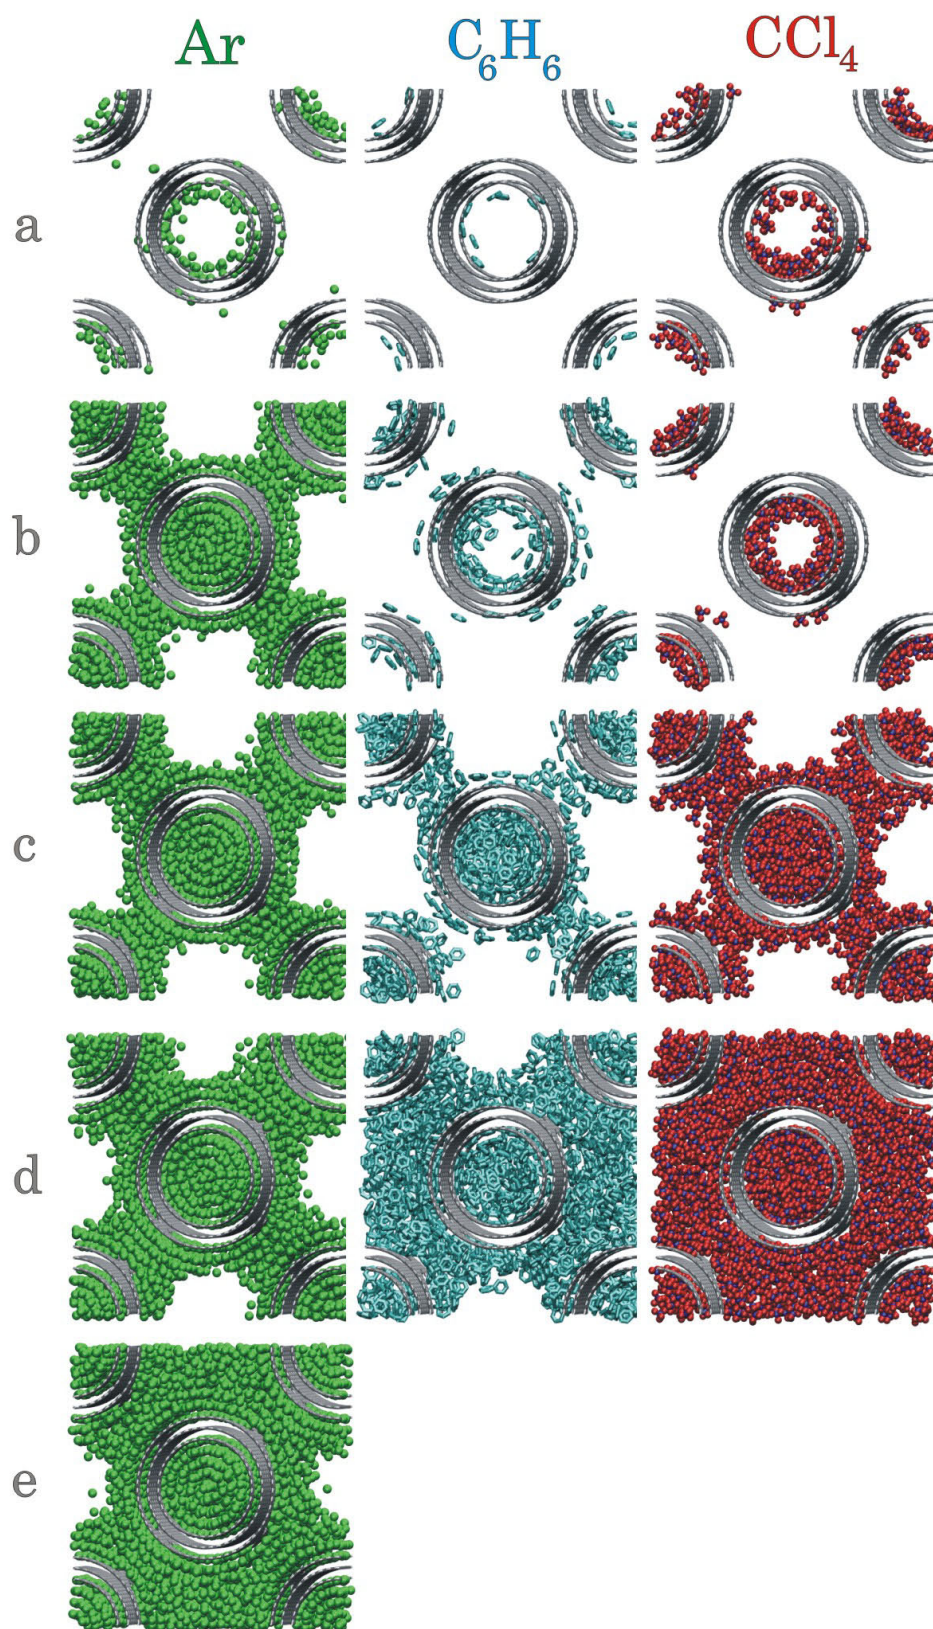

**Fig. S23.** Snapshots for O<sub>80</sub>ca<sub>6</sub> structure in relation to the swings appearing on the  $\alpha_s$ -plots (the  $\alpha_s$  values for *a* – *e* swings are tabulated in tables S4).



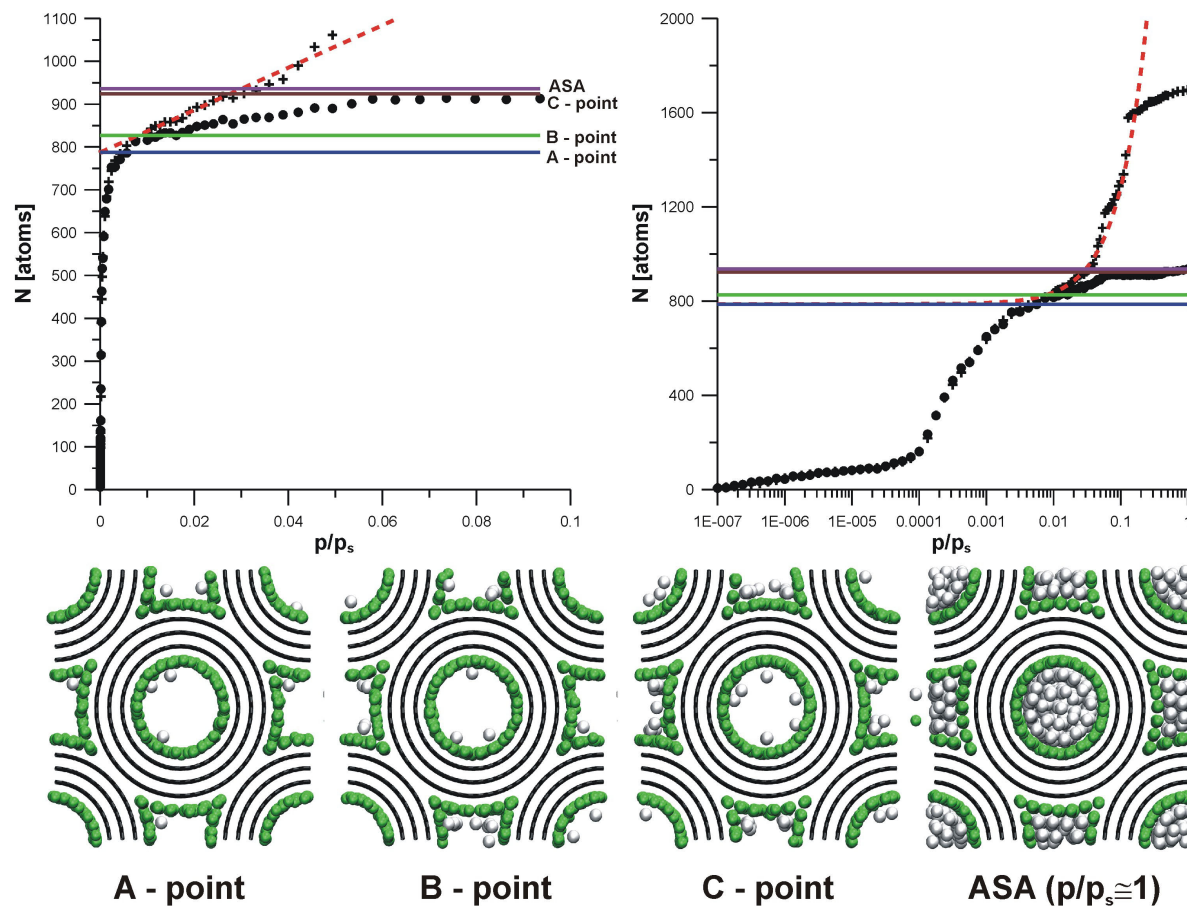

**Fig. S24.** Upper panel – Ar adsorption isotherm for 62\_ca0 structure with marked monolayer adsorption values for A, B, and C-points and ASA method. Bottom panel – the situation in the simulation box with separated molecules adsorbed in monolayer.

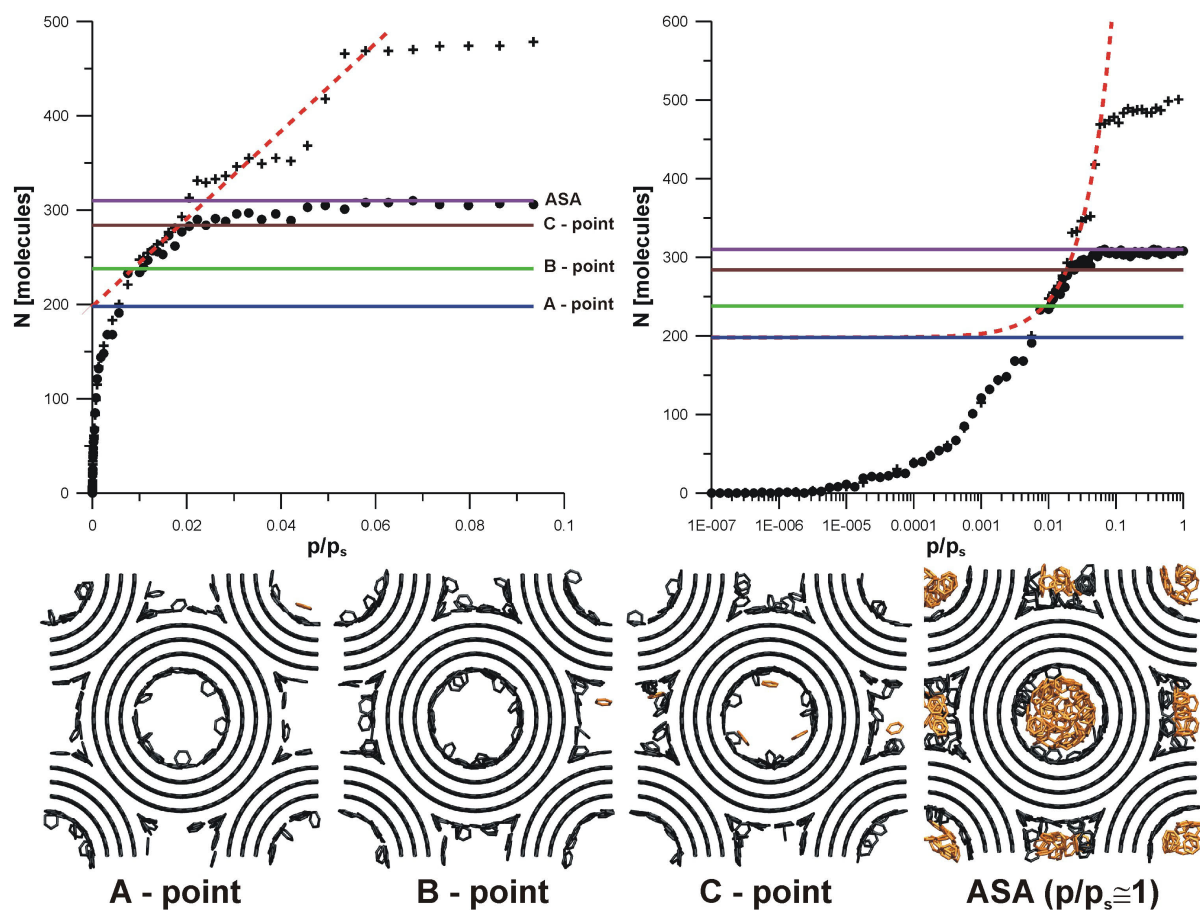

Fig. S25. The same as in Fig. S24 but for  $C_6H_6$  adsorption.

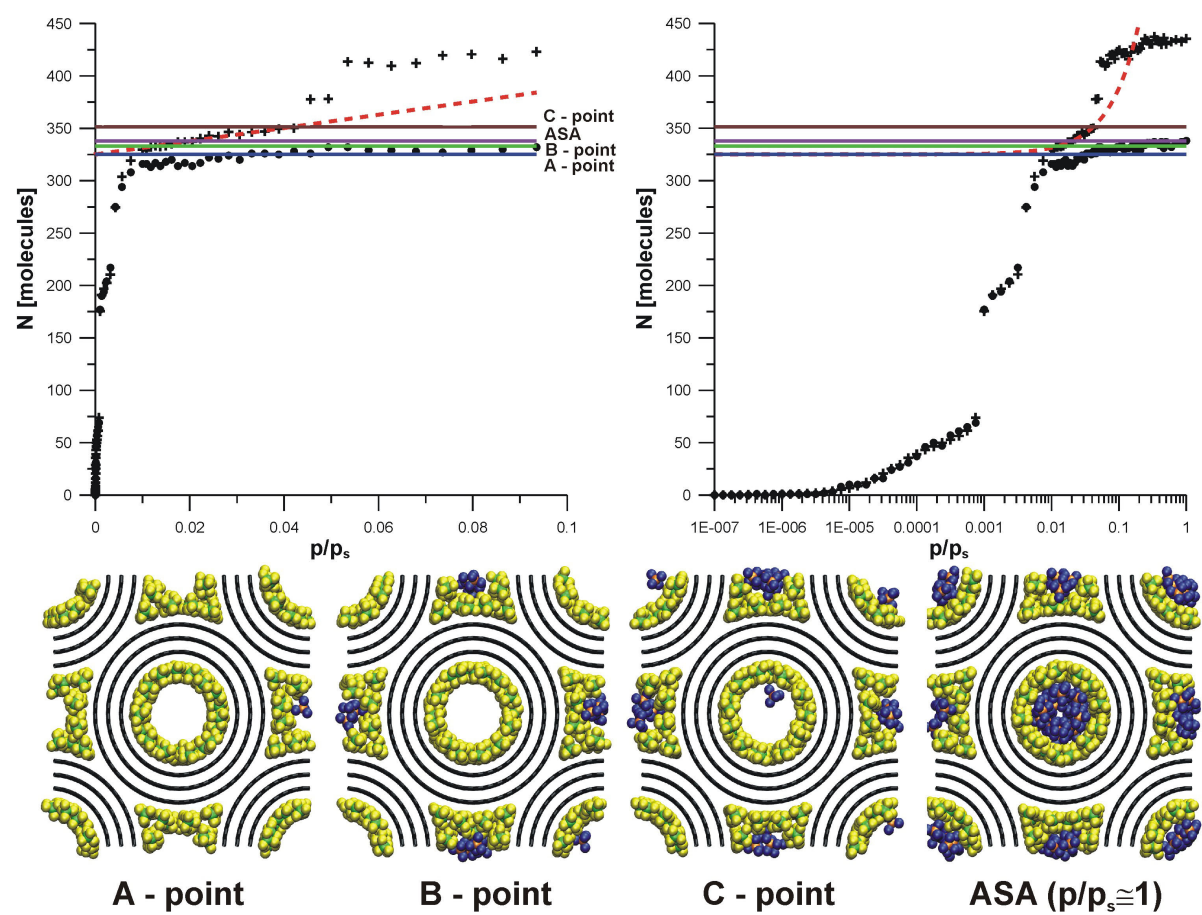

Fig. S26. The same as in Fig. S24 but for  $\text{CCl}_4$  adsorption.
